# Supplementary material for: Communication Apprehension and Eye Contact Anxiety in Video Conferences Involving Teleoperated Robot Avatars: A Subjective Evaluation Study
Source: Front Robot AI. 2021 Nov 5;8:758177. doi: 10.3389/frobt.2021.758177 (PMC8602855; doi:10.3389/frobt.2021.758177)
Supplement: Supplementary file 1 [file Table2.xlsx]

## Sheet: CA
Participants	Daily life CA						Score		Human Condition						Score		Robot Condition						Score
	Q13	Q14	Q15	Q16	Q17	Q18			Q13	Q14	Q15	Q16	Q17	Q18			Q13	Q14	Q15	Q16	Q17	Q18
1	4	4	4	3	4	3	18		4	4	3	3	3	4	19		3	4	4	3	4	3	17
2	5	5	5	4	5	4	18		5	4	5	5	5	5	19		4	4	5	4	5	5	19
3	3	3	4	3	4	2	17		2	3	3	4	4	4	16		4	4	4	3	2	4	21
4	5	5	4	4	3	4	19		4	5	5	4	5	4	17		4	5	5	4	3	4	19
5	4	2	3	4	3	2	18		4	4	5	3	3	4	21		3	4	4	2	3	3	19
6	5	1	5	1	1	5	30		5	2	4	2	2	4	25		5	2	4	2	2	4	25
7	1	5	1	4	4	2	9		2	4	1	4	4	1	10		2	4	1	4	3	2	12
8	2	5	4	5	4	2	12		2	3	4	1	5	4	19		2	5	4	5	4	4	14
9	2	3	4	1	3	2	19		4	2	4	2	2	4	24		2	4	2	2	2	2	16
10	1	4	2	4	4	2	11		2	5	1	5	5	2	8		1	5	1	5	5	1	6
11	1	4	2	4	4	2	11		1	1	1	1	1	2	19		4	2	4	4	4	4	20
12	5	4	5	3	4	3	20		5	5	5	4	4	5	20		4	5	4	4	3	5	19
13	5	5	4	4	5	4	17		4	4	5	5	4	4	18		4	5	5	4	5	4	17
14	5	4	2	3	1	3	20		3	5	3	3	1	3	18		4	5	3	4	3	5	18
15	2	4	2	3	4	2	13		5	1	5	1	1	5	30		1	5	1	5	5	1	6
16	4	3	4	3	4	5	21		2	4	4	5	3	4	16		5	3	3	4	4	4	19
17	4	1	4	2	2	4	25		4	2	4	2	2	4	24		2	4	2	4	4	2	12
18	5	5	4	4	5	4	17		4	4	5	3	3	4	21		4	5	1	4	5	4	13
19	5	4	5	3	4	5	22		3	4	5	5	4	5	18		4	5	4	5	3	4	17
20	3	4	4	3	3	3	18		4	2	4	2	4	4	22		2	4	2	4	4	2	12
21	3	2	3	3	4	3	18		2	4	1	4	1	3	15		1	5	1	4	4	1	8
22	4	4	5	3	4	3	19		4	4	4	4	4	5	19		1	2	5	5	5	1	13
23	2	4	3	4	4	3	14		2	4	2	4	4	2	12		2	3	2	4	4	2	13
24	2	5	1	4	5	1	8		2	4	1	4	5	2	10		2	2	3	4	4	4	17
25	4	2	4	2	2	4	24		2	5	1	5	4	2	9		1	1	1	4	4	1	12
26	5	5	4	4	5	4	17		4	4	5	5	4	4	18		4	5	5	4	5	4	17
27	2	4	4	2	4	2	16		3	4	2	2	4	2	15		2	4	1	4	4	4	13
28	1	4	1	5	5	2	8		2	4	2	4	4	2	12		2	2	5	4	4	1	16
29	3	5	4	4	5	3	14		4	5	4	3	5	3	16		3	4	3	4	5	3	14
30	4	3	4	3	3	3	20		4	4	4	4	3	3	18		3	3	4	3	3	3	19
31	3	4	4	2	4	3	18		3	3	3	2	4	3	18		2	4	3	3	3	3	16
32	2	3	3	3	2	3	18		4	2	3	2	2	4	23		3	3	3	3	3	4	19
33	5	5	4	4	5	4	17		4	4	5	2	2	4	23		4	5	5	4	5	4	17
34	1	3	4	2	2	3	19		1	5	2	4	4	2	10		2	2	2	2	4	1	15
35	5	5	4	4	5	4	17		4	4	5	3	2	4	22		4	5	5	4	5	4	17
36	4	3	4	3	5	2	17		3	4	3	2	4	2	16		3	4	2	4	2	2	15
37	4	4	4	5	4	3	16		4	3	4	3	3	2	19		4	4	4	5	4	3	16
38	4	4	3	5	5	5	16		5	4	3	3	4	3	18		3	4	3	4	3	3	16
39	1	5	4	5	4	5	14		5	4	4	5	4	4	18		4	4	5	4	5	2	16
40	2	3	4	2	4	2	17		2	4	2	4	4	2	12		2	4	2	3	4	2	13
41	5	5	4	4	5	4	17		4	4	5	3	3	4	21		4	5	5	4	5	4	17
42	2	5	1	4	4	1	9		2	2	1	2	1	4	20		1	5	1	4	4	2	9
43	4	4	4	5	5	5	17		4	5	4	4	3	4	18		5	5	5	4	4	4	19
44	5	5	4	4	3	4	19		4	4	3	5	5	4	15		4	5	4	3	4	4	18
45	2	2	4	2	4	2	18		3	2	4	2	4	4	21		2	4	4	4	4	2	14
46	5	5	4	4	5	4	17		4	4	5	5	5	4	17		4	5	5	4	5	4	17
47	4	5	4	3	4	4	18		4	4	5	5	5	4	17		4	5	5	3	5	4	18
48	5	5	4	5	4	4	17		4	5	4	4	5	4	16		4	4	4	4	5	3	16
49	4	5	4	5	4	5	17		5	2	3	4	4	5	21		4	5	5	4	5	4	17
50	4	5	4	5	4	3	15		4	4	4	5	3	4	18		5	4	4	3	4	3	19
51	5	5	4	4	4	4	18		5	5	4	4	3	5	20		4	4	1	4	5	5	15
52	2	2	3	3	2	3	19		4	2	4	1	2	4	25		2	4	1	5	5	2	9
53	4	3	4	3	5	4	19		4	2	4	3	3	4	22		4	3	4	4	5	4	18
54	1	5	4	2	5	1	12		2	2	2	4	5	2	13		2	2	1	5	5	2	11
55	5	5	4	4	3	4	19		4	4	4	5	5	4	16		4	5	5	4	3	4	19
56	2	5	3	5	4	2	11		1	5	2	4	2	3	13		1	5	1	4	5	1	7
57	4	4	3	3	4	5	19		5	3	3	4	4	3	18		3	4	3	4	4	5	17
58	1	1	1	5	5	1	10		1	5	1	5	5	1	6		1	1	1	5	5	1	10
59	4	5	4	5	4	3	15		4	2	5	3	3	4	23		4	5	5	4	5	5	18
60	2	3	4	4	5	4	16		4	3	4	4	5	4	18		3	3	3	4	4	4	17
61	5	5	4	4	3	4	19		4	4	5	3	5	4	19		4	5	5	4	5	4	17
62	4	4	5	5	4	3	17		3	5	4	4	4	5	17		4	4	5	4	3	5	21
63	2	4	2	3	4	2	13		2	4	2	4	4	2	12		1	4	1	4	4	1	9
64	4	5	4	4	5	4	16		4	4	5	5	3	4	19		4	3	4	5	5	4	17
65	4	5	4	5	4	5	17		5	4	4	4	5	4	18		4	5	4	5	4	4	16
66	5	5	4	4	5	4	17		4	4	5	3	5	4	19		4	5	5	4	3	4	19
67	5	5	4	4	3	4	19		5	4	4	5	4	4	18		5	4	5	4	4	4	20
68	1	5	5	5	5	1	10		5	4	4	5	4	4	18		2	2	2	4	5	1	12
69	4	3	2	3	2	4	20		4	3	2	2	2	4	21		2	2	2	3	3	2	16
70	5	5	4	4	3	4	19		4	4	5	3	5	4	19		5	4	5	3	4	3	20
71	5	3	5	5	5	5	20		2	5	2	5	1	2	13		1	1	5	4	5	2	16
72	2	5	1	5	5	4	10		3	5	4	4	4	1	13		2	2	4	2	1	1	20
73	5	5	4	4	5	4	17		4	4	5	5	5	4	17		4	5	5	4	4	4	18
74	4	2	1	2	2	4	21		3	3	2	2	4	2	16		2	4	2	4	4	2	12
75	5	5	4	4	5	4	17		5	4	5	4	4	5	21		4	5	4	5	4	4	16
76	4	5	4	3	4	4	18		2	4	2	4	2	2	14		3	2	2	3	2	2	18
77	4	3	4	3	4	4	20		3	5	3	3	4	3	15		5	4	5	4	3	3	20
78	3	4	4	4	4	4	17		3	5	2	4	4	3	13		3	3	3	4	4	3	16
79	2	4	2	4	5	2	11		1	4	2	5	2	2	12		1	1	1	5	4	2	12
80	4	3	4	4	4	4	19		3	4	3	4	3	4	17		3	3	3	4	4	4	17
81	4	4	5	5	4	5	19		5	5	4	4	4	5	19		5	4	4	5	4	5	19
82	4	4	5	4	5	4	18		4	5	4	4	4	5	18		4	4	4	4	5	5	18
83	4	2	4	2	2	4	24		2	4	2	4	4	2	12		2	5	1	5	5	2	8
84	2	2	2	3	2	4	19		4	4	3	3	3	2	17		3	4	3	3	4	3	16
85	3	4	3	4	4	3	15		3	3	4	4	3	4	19		4	3	3	4	3	3	18
86	5	5	4	4	5	4	17		4	4	5	5	5	4	17		4	5	5	4	5	4	17
87	5	5	4	4	5	4	17		4	4	5	3	5	4	19		4	5	4	4	5	4	16
88	3	4	3	4	4	2	14		4	2	2	4	4	2	16		2	2	2	4	4	2	14
89	2	2	3	2	2	2	19		3	4	3	4	4	3	15		2	2	2	4	4	2	14
90	5	4	5	4	5	4	19		4	4	5	5	4	5	19		4	4	5	4	5	5	19
91	3	2	4	4	3	4	20		2	2	3	1	3	4	21		3	4	3	3	3	4	18
92	5	5	4	4	5	4	17		4	4	5	5	5	4	17		4	5	5	4	5	4	17
93	4	5	4	5	3	4	17		4	4	5	3	5	4	19		4	5	4	4	3	4	18
94	5	5	4	4	5	4	17		4	5	4	4	5	4	16		4	4	3	4	2	4	19
95	4	4	5	5	4	5	19		4	4	5	5	5	4	17		4	5	5	4	5	4	17
96	1	5	2	5	5	1	7		3	3	1	3	4	2	14		1	4	1	5	4	1	8
97	2	4	4	4	4	4	16		2	4	2	4	2	2	14		2	4	2	4	4	2	12
98	2	2	3	3	4	3	17		2	4	4	3	2	3	18		3	2	2	3	4	3	17
99	5	5	4	2	3	3	20		4	2	3	2	3	4	22		4	4	3	2	2	3	20
100	3	2	4	1	2	3	23		2	4	2	3	4	2	13		3	4	2	4	4	3	14
101	5	5	4	4	5	4	17		4	4	5	5	5	4	17		4	5	5	4	5	4	17
102	5	5	4	4	5	4	17		3	3	4	4	4	3	17		3	4	4	3	4	3	17
103	3	4	3	5	4	3	14		3	3	4	4	4	3	17		3	4	4	3	4	3	17
104	4	2	4	1	2	4	25		3	4	1	4	4	2	12		2	3	4	3	3	4	19
105	2	3	4	2	3	2	18		1	4	2	4	4	2	11		3	2	2	4	4	2	15
106	4	5	4	3	5	4	17		4	4	5	5	5	4	17		5	4	4	3	4	3	19
107	4	4	3	3	4	3	17		3	3	4	4	4	3	17		4	3	3	4	3	5	20
108	4	4	5	5	4	5	19		4	4	4	5	5	4	16		4	4	4	5	5	5	17
109	3	4	3	4	5	5	16		5	3	4	4	4	3	19		3	4	4	5	4	5	17
110	5	5	4	4	5	4	17		4	4	4	5	3	4	18		4	3	4	4	5	4	18
111	5	5	4	4	5	4	17		4	4	5	5	5	4	17		4	5	5	4	5	4	17
112	3	3	4	4	3	2	17		5	3	4	4	4	3	19		5	3	4	3	4	4	21
113	4	5	4	5	4	5	17		4	5	4	4	5	4	16		4	5	5	4	5	4	17
114	4	2	5	2	2	4	25		4	2	4	2	4	4	22		4	2	4	2	2	4	24
115	2	4	2	4	4	2	12		3	3	2	3	4	2	15		3	4	2	3	3	2	15
116	4	5	4	3	4	4	18		4	4	5	4	5	4	18		4	4	5	4	3	5	21
117	5	5	4	4	5	4	17		4	4	5	3	5	4	19		5	4	4	3	4	3	19
118	3	3	4	4	3	4	19		5	3	4	3	3	4	22		4	3	3	4	3	4	19
119	4	4	5	5	4	5	19		3	3	4	4	4	3	17		3	4	4	3	4	3	17
120	4	4	3	3	4	3	17		3	3	4	4	4	3	17		3	4	4	3	4	3	17
121	4	4	3	3	4	3	17		3	2	4	2	3	5	23		3	4	4	3	4	3	17
122	3	3	4	4	5	4	17		5	3	4	4	3	4	21		5	4	4	4	3	3	19
123	3	4	5	4	4	3	17		5	3	5	4	4	5	22		5	4	4	5	4	5	19
124	4	4	3	3	4	3	17		5	3	4	4	2	5	23		3	4	4	3	4	3	17
125	5	5	4	4	5	4	17		4	4	5	2	2	4	23		4	5	5	4	5	4	17
126	4	4	3	3	4	3	17		3	3	4	4	4	3	17		3	4	4	3	4	3	17
127	4	4	3	3	4	4	18		3	3	4	4	4	4	18		3	3	2	3	3	4	18
128	2	3	4	3	4	2	16		3	2	1	4	3	4	17		3	3	2	4	3	4	17
129	3	2	4	2	4	3	20		2	2	3	2	3	3	19		2	3	2	4	4	3	14
130	4	4	5	5	4	5	19		5	5	4	4	4	5	19		5	4	4	5	4	5	19
131	4	4	3	3	4	3	17		3	4	3	3	4	4	17		4	4	3	4	3	4	18
132	4	4	5	5	4	5	19		5	5	4	4	4	5	19		4	4	5	4	5	5	19
133	3	4	3	4	4	3	15		3	3	4	4	4	3	17		3	4	4	3	4	3	17
134	2	3	4	2	4	2	17		2	2	3	3	3	2	17		2	3	2	3	4	3	15
135	4	5	4	2	5	3	17		4	5	3	3	3	4	18		4	3	3	4	2	4	20
136	4	4	3	3	4	5	19		3	5	4	4	5	4	15		4	3	4	3	5	4	19
137	5	5	4	4	5	4	17		4	4	5	5	5	4	17		5	4	4	5	4	5	19
138	4	3	5	3	4	5	22		4	5	4	5	3	5	18		4	2	4	5	3	4	20
139	5	5	4	4	5	4	17		4	4	3	4	5	4	16		3	4	4	3	4	4	18
140	2	3	2	2	2	4	19		3	2	3	2	4	3	19		2	3	2	1	2	4	20
141	2	3	1	4	4	2	12		3	2	3	2	2	3	21		2	5	2	4	4	1	10
142	3	2	3	3	2	3	20		3	4	4	4	4	4	17		5	4	3	4	4	4	18
143	3	3	4	4	2	5	21		4	5	4	3	4	2	16		4	5	3	4	3	4	17
144	1	2	3	2	2	3	19		3	4	3	3	4	2	15		3	3	4	3	4	2	17
145	4	3	4	3	4	2	18		3	3	4	4	4	4	18		2	2	4	4	4	2	16
146	5	5	4	4	4	4	18		4	4	5	5	5	4	17		4	4	4	4	4	4	18
147	1	4	2	4	5	2	10		1	4	1	4	4	2	10		2	4	2	4	4	2	12
148	2	4	4	3	4	4	17		2	3	4	4	4	2	15		4	4	2	4	4	4	16
149	3	3	3	3	4	3	17		2	4	2	4	4	2	12		2	4	2	4	4	2	12
150	5	4	4	5	4	4	18		5	4	4	5	4	4	18		4	4	5	5	5	4	17
151	3	4	4	3	4	4	18		4	3	3	4	4	4	18		4	4	4	4	3	4	19
152	3	3	2	2	4	2	16		2	2	1	1	3	2	17		2	1	2	2	1	2	20
153	1	3	4	4	4	3	15		4	3	3	4	3	4	19		4	3	5	4	4	4	20
154	2	4	3	3	4	2	14		2	4	3	4	3	3	15		2	2	3	4	4	3	16
155	4	2	4	3	4	3	20		3	2	3	4	2	4	20		2	4	4	4	3	3	16
156	3	3	4	4	3	4	19		4	4	5	4	5	4	18		4	3	3	4	3	4	19
157	2	2	4	2	2	4	22		4	2	4	2	2	4	24		2	4	1	4	4	2	11
158	2	4	3	3	3	3	16		4	3	3	4	3	4	19		3	3	3	3	3	3	18
159	2	4	5	2	4	4	19		4	2	4	2	4	4	22		2	4	2	4	4	2	12
160	4	2	3	2	3	3	21		2	4	2	4	4	2	12		1	1	1	5	5	1	10
161	2	4	2	3	3	3	15		3	3	3	3	4	3	17		2	2	2	2	2	2	18
162	3	3	5	4	3	4	20		4	4	4	3	3	4	20		5	4	4	3	4	3	19
163	3	3	3	2	3	3	19		1	4	1	4	1	2	13		4	2	4	2	2	3	23
164	4	2	4	3	1	4	24		2	4	2	4	4	2	12		1	4	1	4	4	2	10
165	3	3	4	4	5	4	17		4	4	5	3	5	3	18		2	4	4	3	4	2	15
166	2	5	1	4	5	1	8		1	4	2	4	4	1	10		3	4	2	4	3	2	14
167	5	5	5	5	5	5	18		5	5	5	5	5	5	18		1	5	3	5	1	1	12
168	1	5	1	5	5	1	6		1	1	1	1	1	1	18		1	5	1	5	5	1	6
169	5	5	3	4	3	2	16		3	3	2	2	4	4	18		5	1	1	5	5	1	14
170	4	3	4	3	4	4	20		4	4	4	5	4	3	16		3	4	3	3	4	3	16
171	3	1	5	1	2	4	26		5	2	3	2	2	4	24		4	2	2	2	2	4	22
172	2	4	2	4	4	2	12		4	4	2	4	2	2	16		2	5	2	4	4	2	11
173	2	4	2	3	4	2	13		2	4	2	4	4	2	12		2	4	2	4	2	2	14
174	3	5	4	4	3	4	17		4	4	3	3	5	4	17		4	3	3	4	3	4	19
175	4	5	4	3	5	3	16		4	5	4	4	5	4	16		4	3	3	4	3	4	19
176	1	4	1	4	4	1	9		2	4	3	3	4	2	14		1	1	1	4	4	1	12
177	3	2	3	2	2	3	21		2	4	2	4	4	2	12		2	2	2	4	4	2	14
178	3	3	4	2	3	4	21		4	4	3	3	3	4	19		3	4	3	3	4	3	16
179	3	3	4	4	3	4	19		4	2	4	3	3	4	22		4	3	3	4	3	4	19
180	1	4	2	4	4	1	10		2	4	1	4	4	2	11		1	4	1	4	4	1	9
181	5	4	5	4	5	5	20		3	5	3	3	4	3	15		4	3	3	5	3	4	18
182	3	3	3	2	3	4	20		2	3	3	3	3	3	17		3	3	3	3	2	3	19
183	4	3	4	4	2	4	21		3	2	3	4	4	5	19		4	3	4	2	3	4	22
184	2	4	2	4	4	2	12		2	4	2	4	4	2	12		2	4	2	4	4	2	12
185	4	4	2	4	3	3	16		2	4	2	4	4	1	11		2	4	2	4	4	2	12
186	1	4	2	4	4	2	11		1	4	1	5	4	2	9		1	1	1	4	4	1	12
187	1	4	2	5	5	2	9		4	4	2	4	4	4	16		1	4	1	5	4	1	8
188	4	2	4	2	2	2	22		2	2	3	3	2	3	19		3	2	3	3	4	4	19
189	2	4	4	3	4	2	15		2	4	2	4	3	2	13		2	4	2	4	4	3	13
190	1	4	3	4	5	2	11		2	4	1	4	4	3	12		1	4	1	4	4	1	9
191	3	3	3	3	3	3	18		4	4	4	4	4	4	18		3	3	3	3	3	3	18
192	2	2	3	3	4	2	16		4	2	3	2	2	4	23		3	4	2	4	4	3	14
193	2	2	3	3	4	3	17		3	2	3	3	4	3	18		5	3	5	4	4	2	19
194	1	1	2	4	4	1	13		5	1	5	1	1	5	30		4	1	4	1	1	4	27
195	3	3	2	3	4	2	15		2	4	2	3	4	2	13		2	3	2	4	3	2	14
196	3	4	2	2	4	3	16		4	3	3	2	3	4	21		4	3	3	2	3	2	19
197	2	4	3	3	3	3	16		3	3	2	3	4	4	17		2	4	2	4	4	2	12
198	2	2	4	2	4	2	18		2	4	2	4	4	2	12		2	4	2	4	4	2	12
199	3	5	3	4	4	3	14		3	2	3	4	4	3	17		3	4	4	3	4	3	17
200	3	3	3	3	3	3	18		1	1	1	1	1	1	18		2	4	1	5	5	2	9

## Sheet: AEC
Participants	Daily life AEC																																		SCORE
	Fear subtotal																	Avoidance subtotal
	Q1	Q2	Q3	Q4	Q5	Q6	Q7	Q8	Q9	Q10	Q11	Q12	Q13	Q14	Q15	Q16	Q17	Q1	Q2	Q3	Q4	Q5	Q6	Q7	Q8	Q9	Q10	Q11	Q12	Q13	Q14	Q15	Q16	Q17
1	3	1	3	1	2	3	2	3	1	2	1	1	1	2	2	2	2	2	2	2	1	1	2	3	2	2	2	2	3	2	3	2	1	1	65
2	3	2	2	2	3	2	2	3	3	3	2	3	2	3	2	2	3	3	2	2	2	3	3	3	3	3	2	2	2	2	3	3	3	3	86
3	1	1	1	1	1	1	1	0	0	0	0	0	1	0	1	1	0	0	1	1	1	1	1	1	1	1	1	1	1	0	0	1	1	1	24
4	2	2	1	3	2	1	1	2	2	2	3	2	2	1	1	3	2	2	3	2	3	1	2	2	2	2	2	1	1	3	1	1	2	3	65
5	1	2	3	1	1	2	2	1	3	1	1	2	1	2	2	1	1	2	2	1	0	1	1	2	2	1	1	1	2	1	1	1	2	2	50
6	1	1	2	3	3	3	1	3	2	3	3	0	2	0	1	2	3	0	2	3	3	3	3	1	2	2	1	3	3	3	0	1	2	1	66
7	3	0	0	0	0	0	0	3	3	0	0	3	0	0	3	3	0	0	3	0	0	3	0	3	0	0	3	3	0	0	3	0	3	3	42
8	2	2	2	3	2	2	0	2	0	3	2	0	3	3	2	1	3	1	1	0	3	0	1	1	1	2	0	2	1	1	1	3	2	1	53
9	2	1	3	1	1	2	2	3	1	1	2	3	2	1	1	3	3	2	2	1	3	2	2	3	1	3	3	3	3	3	1	3	1	0	68
10	0	0	0	0	0	0	0	0	0	0	0	0	0	0	0	0	0	0	0	0	0	1	1	0	0	0	0	0	0	0	0	0	0	0	2
11	0	0	1	2	1	0	0	0	0	0	0	2	0	0	1	0	1	0	1	2	1	1	1	2	0	0	1	2	0	2	3	0	1	1	26
12	2	1	2	1	3	3	1	3	2	3	1	1	2	3	3	1	2	3	2	2	2	1	2	3	3	2	2	2	2	2	3	2	3	1	71
13	2	2	3	3	2	2	3	2	2	3	3	2	3	2	3	3	3	2	3	3	2	2	3	2	2	2	3	3	2	3	2	3	2	2	84
14	2	0	1	0	1	2	1	2	2	3	1	2	3	1	2	1	3	0	2	2	3	1	0	2	2	2	1	3	0	1	2	1	1	1	51
15	1	0	0	1	1	0	1	2	2	2	2	0	1	0	0	1	1	0	2	1	1	1	1	0	0	0	0	2	0	3	0	0	1	0	27
16	0	3	1	1	2	2	2	3	1	2	1	2	2	0	2	2	1	3	1	1	1	3	0	2	3	2	2	3	3	2	1	1	2	0	57
17	0	2	2	1	1	0	2	2	1	2	0	0	1	0	1	2	0	0	2	0	1	3	1	2	0	0	1	1	0	2	0	0	3	3	36
18	3	3	3	2	2	3	2	3	3	2	3	3	3	2	2	2	2	2	3	2	3	3	2	3	3	3	2	2	3	2	3	2	2	3	86
19	3	2	2	3	1	2	3	2	3	1	3	2	3	2	2	2	3	2	2	3	2	1	3	3	1	3	3	3	2	1	2	3	3	2	78
20	0	0	0	1	1	0	2	3	1	2	0	0	3	0	2	2	3	0	1	2	0	2	1	3	0	3	0	3	2	3	0	0	1	1	42
21	0	1	1	0	2	0	0	1	0	0	1	0	0	0	0	2	1	0	0	0	0	2	2	1	0	1	0	0	0	1	0	0	2	1	19
22	3	3	2	1	3	1	1	2	2	3	1	3	2	3	2	2	2	2	2	2	2	1	2	2	2	2	2	2	2	2	1	2	3	3	70
23	1	0	1	1	1	1	1	2	1	0	1	1	0	0	0	2	0	0	1	0	0	1	1	1	1	0	1	1	1	1	0	1	1	1	25
24	2	0	1	0	0	0	1	3	2	0	0	2	0	0	2	3	1	1	2	2	0	3	1	3	0	0	3	3	1	2	2	1	2	2	45
25	2	1	2	1	0	0	1	3	1	1	1	3	0	3	2	2	0	0	2	2	0	3	0	0	2	1	0	3	1	2	0	0	2	0	41
26	2	3	2	3	2	3	3	2	2	2	2	2	2	3	2	3	3	3	3	3	3	3	2	2	2	2	3	3	2	3	2	2	2	2	83
27	1	1	1	1	1	1	1	0	1	2	1	1	1	2	2	2	0	1	2	2	2	1	2	2	1	2	2	2	1	1	1	2	1	1	45
28	0	0	0	1	1	1	0	1	0	0	0	0	0	0	1	0	0	0	3	1	1	2	2	1	0	0	0	0	0	1	0	0	1	0	17
29	2	2	2	2	2	2	2	1	3	0	3	3	1	1	1	1	1	2	2	1	1	3	0	2	1	1	3	1	2	2	2	1	1	2	56
30	2	1	2	2	2	2	2	1	2	1	1	1	1	1	2	2	1	2	2	1	1	2	2	1	2	1	1	1	1	1	1	2	2	2	51
31	2	1	1	2	2	1	3	2	1	0	1	2	2	0	1	2	2	3	1	2	1	1	2	2	1	1	1	2	2	3	1	0	2	2	52
32	1	1	1	1	2	2	2	3	2	1	1	1	2	0	1	2	0	1	1	2	2	2	2	1	1	1	2	2	1	2	1	2	1	2	49
33	2	3	3	3	2	3	3	2	2	2	3	2	3	2	3	3	2	2	3	3	3	2	2	2	2	2	3	3	3	3	2	2	2	2	84
34	1	1	0	0	3	1	0	1	1	2	2	3	0	1	3	3	1	0	3	0	1	2	2	1	1	1	3	2	2	2	2	2	2	2	51
35	2	1	2	2	1	1	1	2	3	3	2	2	2	1	1	1	1	1	3	3	2	2	3	2	1	3	3	3	2	3	2	2	2	2	67
36	3	2	2	1	3	1	3	2	1	1	3	3	1	3	1	2	1	2	3	1	2	2	3	2	1	2	2	2	2	1	1	0	1	2	62
37	2	1	2	1	0	0	1	2	2	1	1	2	1	1	2	1	1	0	2	1	0	1	1	0	1	2	1	1	2	2	2	0	1	2	40
38	2	2	2	2	2	2	3	3	2	3	2	2	3	2	3	1	3	3	2	1	3	3	3	2	3	3	3	2	3	3	3	1	2	2	81
39	0	1	0	0	1	2	1	0	1	2	0	1	2	1	0	0	1	1	1	0	0	0	1	1	1	1	1	1	3	1	2	2	1	1	31
40	0	0	0	0	1	0	0	0	0	0	0	0	0	0	0	1	0	0	0	1	1	1	0	1	0	0	0	1	0	0	0	0	1	0	8
41	2	2	2	2	2	3	3	2	2	3	2	2	2	3	3	3	3	3	3	3	3	2	2	2	3	3	3	3	2	3	2	3	2	2	85
42	1	0	0	0	0	1	1	0	1	1	0	0	0	1	1	0	1	0	0	0	0	0	1	1	0	0	1	0	0	1	0	0	1	0	13
43	2	1	1	0	1	1	0	1	1	1	1	0	0	1	1	2	2	1	1	1	2	1	1	2	1	1	1	1	2	1	2	0	2	1	37
44	3	1	2	3	2	3	2	1	3	2	1	2	2	3	2	2	2	1	2	1	1	1	2	2	2	2	1	3	2	2	2	2	1	2	65
45	0	1	1	2	1	1	0	0	0	1	2	0	2	1	1	2	0	1	1	2	1	2	0	1	2	1	1	1	2	1	0	0	1	1	33
46	1	0	1	1	1	0	2	1	1	1	1	1	1	0	2	2	0	0	2	2	1	1	0	1	0	0	2	2	0	2	1	1	1	1	33
47	1	1	3	1	2	2	3	3	2	1	2	1	1	2	3	1	3	2	1	1	1	2	1	2	2	2	1	2	2	2	2	2	2	2	61
48	2	1	2	2	2	1	1	2	2	2	2	2	3	3	1	1	2	2	3	2	3	2	2	1	3	2	3	1	3	3	2	2	2	2	69
49	2	1	2	3	1	3	2	3	1	2	3	2	1	2	1	3	2	2	3	1	1	3	2	2	2	2	2	1	3	2	2	2	1	2	67
50	3	2	1	1	1	0	2	3	1	2	1	2	2	2	2	2	2	1	1	1	2	2	1	2	0	2	3	1	3	2	2	1	2	2	57
51	1	2	2	2	2	0	1	2	2	2	2	2	3	2	2	1	1	3	1	3	2	3	1	1	0	0	3	1	2	2	2	0	3	2	58
52	2	2	1	2	2	1	2	1	0	3	0	1	1	0	2	1	1	1	2	1	1	1	2	0	1	1	3	2	2	2	2	1	1	2	47
53	2	3	2	3	2	1	2	1	2	2	1	2	2	3	2	3	2	2	1	2	1	2	2	2	2	2	2	1	1	2	2	2	2	3	66
54	0	1	0	2	2	0	2	0	1	0	0	0	0	1	1	0	0	1	0	3	1	0	1	0	0	0	0	0	2	1	1	0	0	1	21
55	3	2	1	2	1	2	2	3	1	1	1	2	2	1	2	2	0	2	3	2	2	2	2	1	2	1	2	1	2	2	2	1	2	3	60
56	0	0	1	1	0	1	0	1	2	3	0	3	0	2	0	1	0	3	0	3	0	1	0	0	0	0	0	1	0	0	3	1	0	0	27
57	3	2	2	2	2	1	2	3	1	2	3	1	1	2	2	2	2	2	3	2	3	1	2	3	1	2	2	2	1	2	2	2	2	1	66
58	0	0	0	0	2	0	0	2	0	0	1	0	0	0	0	0	1	0	0	0	1	0	0	1	0	0	0	0	0	1	0	0	2	0	11
59	3	1	2	3	2	3	2	3	1	2	3	2	2	3	2	2	2	1	1	2	1	3	2	3	3	2	2	3	3	3	1	2	2	3	75
60	1	1	2	1	1	1	1	1	0	1	1	1	1	1	1	0	2	0	1	0	2	2	1	1	2	1	1	2	1	0	1	2	1	1	36
61	1	2	1	3	1	2	2	0	1	3	2	2	2	0	0	2	1	1	2	1	2	1	3	3	2	2	1	1	2	1	0	1	1	2	51
62	2	1	2	3	3	3	2	2	3	2	2	3	3	2	2	2	3	3	2	3	2	1	2	2	3	2	3	2	3	3	3	2	3	2	81
63	0	0	0	0	1	0	0	1	0	0	0	0	1	0	0	1	0	0	0	0	0	1	0	1	0	1	0	2	0	2	0	0	1	0	12
64	1	1	1	1	1	2	1	1	3	1	2	3	1	2	3	2	1	2	1	2	2	2	1	1	2	2	1	2	2	2	2	2	2	2	57
65	1	1	1	2	2	1	2	1	2	2	2	2	2	2	2	1	1	2	1	2	1	2	2	1	2	1	2	1	2	1	2	2	2	1	54
66	2	3	3	1	3	1	2	3	2	2	3	1	1	2	1	3	2	2	3	3	2	2	1	2	2	2	1	3	1	2	2	2	2	2	69
67	1	2	3	2	1	3	2	1	1	3	2	1	3	2	1	2	2	3	1	2	2	2	3	2	3	2	2	2	3	2	1	2	2	1	67
68	0	1	1	1	1	1	2	1	1	2	1	1	1	0	1	1	0	2	1	2	2	2	1	1	1	0	0	2	1	1	1	0	1	1	35
69	1	0	3	1	1	2	1	3	2	2	0	0	2	0	3	0	3	1	2	2	2	0	0	1	2	2	2	2	1	1	1	1	1	0	45
70	2	3	2	1	2	3	3	1	2	2	3	3	3	3	3	3	2	2	3	2	3	2	2	1	3	2	2	2	3	2	1	2	2	3	78
71	3	1	1	1	1	1	2	3	3	2	1	3	1	1	1	2	1	1	3	2	1	2	1	3	0	0	3	3	1	2	3	1	2	2	58
72	1	1	1	0	0	1	1	0	0	0	1	0	0	1	0	0	0	2	1	3	1	0	0	0	0	1	0	1	1	1	1	0	0	1	20
73	2	2	2	2	1	2	1	2	2	3	2	1	2	3	2	2	1	2	3	3	2	1	3	2	1	2	3	1	2	3	2	1	2	2	67
74	0	0	1	2	0	2	0	0	0	1	1	3	0	1	0	0	0	1	1	0	1	3	0	0	1	0	0	1	0	0	0	0	1	1	21
75	1	3	2	2	1	1	3	3	2	1	2	1	3	1	2	2	2	3	1	2	2	2	3	3	1	3	3	2	1	2	2	2	2	1	67
76	2	2	2	1	2	2	1	2	2	1	1	2	2	1	2	3	2	1	2	2	1	1	0	3	2	2	2	2	2	3	3	1	2	2	61
77	2	2	2	2	2	2	2	3	1	1	1	1	3	1	1	3	3	2	3	3	3	2	1	2	3	1	1	2	2	2	3	3	2	2	69
78	2	2	2	2	2	2	2	2	2	1	2	2	2	1	3	2	1	1	2	3	1	2	1	2	1	2	3	3	2	2	2	2	2	2	65
79	0	0	0	2	0	0	1	0	2	0	0	0	0	1	0	0	2	1	0	2	0	0	0	0	0	0	0	0	0	1	0	1	0	0	13
80	1	1	1	2	1	1	1	1	0	2	1	1	0	1	1	2	1	0	2	1	2	2	1	1	1	1	1	1	1	0	2	1	1	0	36
81	3	3	3	3	3	2	2	3	3	2	3	3	3	2	2	2	2	2	2	2	2	3	3	3	2	2	2	2	3	2	3	2	3	3	85
82	3	2	3	2	3	1	3	3	2	3	3	2	2	3	3	2	2	2	2	2	2	2	2	3	2	3	1	3	2	2	2	2	3	2	79
83	0	1	0	0	1	1	1	0	1	0	0	1	1	0	1	3	0	1	2	1	0	1	1	1	0	0	1	1	0	1	0	0	2	1	24
84	2	2	2	1	2	2	3	3	3	2	2	3	2	3	3	0	3	2	0	2	1	2	3	2	2	3	3	3	2	3	3	2	1	3	75
85	2	1	1	2	1	1	1	2	2	2	1	2	2	1	1	2	1	2	2	1	2	2	1	2	2	1	2	1	2	2	1	2	1	2	53
86	2	3	3	3	2	3	3	2	2	2	3	2	3	2	3	3	2	2	3	3	3	2	2	2	2	2	3	3	3	3	2	2	2	2	84
87	1	2	2	3	2	1	2	1	3	3	2	3	2	1	1	2	1	3	3	2	3	2	2	1	3	2	2	2	2	2	1	1	2	3	68
88	1	1	0	0	1	1	2	1	1	1	1	2	0	0	1	2	1	0	2	1	1	1	1	2	1	0	1	1	2	2	1	2	2	2	38
89	0	0	0	0	0	0	0	0	0	0	0	0	0	0	0	0	0	0	0	0	0	0	0	0	0	0	0	0	0	0	0	0	0	0	0
90	2	2	2	3	3	2	3	3	3	2	3	2	3	2	3	2	2	2	2	3	2	2	3	0	3	0	3	3	2	3	2	3	3	2	80
91	1	2	2	3	1	2	2	3	1	1	2	2	2	3	2	2	1	1	1	1	2	3	3	2	1	2	1	2	0	3	3	1	2	2	62
92	3	2	2	2	3	2	2	3	3	3	2	3	2	3	2	2	3	3	2	2	2	3	3	3	3	3	2	2	2	2	3	3	3	3	86
93	2	3	2	3	2	1	2	3	2	2	3	1	1	3	1	3	2	2	3	3	3	2	2	2	1	2	2	2	1	2	3	2	2	2	72
94	3	3	2	2	2	1	3	2	2	2	2	3	2	3	2	3	3	3	2	3	3	3	2	2	3	3	3	2	2	2	2	2	3	2	82
95	2	2	3	3	2	2	3	2	3	2	3	2	3	2	3	2	2	2	2	3	3	3	3	2	2	2	3	3	3	3	2	3	3	2	85
96	0	0	0	0	1	0	0	2	0	1	0	0	0	0	0	0	1	0	1	0	1	0	0	0	0	0	0	0	0	0	0	0	1	0	8
97	2	0	0	0	0	0	1	1	1	0	0	2	0	0	2	2	0	0	2	2	0	2	0	2	0	0	2	2	0	2	2	0	2	2	31
98	2	2	2	1	1	2	2	1	2	3	2	1	2	1	1	3	2	1	1	3	2	2	1	2	1	2	0	2	1	2	1	1	2	1	55
99	1	0	1	2	2	2	2	2	0	1	1	0	2	1	1	0	3	1	3	3	2	3	2	3	1	3	1	3	2	2	0	1	3	1	55
100	0	1	1	1	1	1	1	1	1	1	1	0	1	0	1	1	1	0	2	2	1	3	2	1	1	0	1	2	1	2	0	0	2	1	35
101	2	3	3	3	2	3	3	2	2	2	3	2	3	2	3	3	2	2	3	3	3	2	2	3	2	2	3	3	3	3	2	2	2	2	85
102	2	3	3	3	2	3	3	2	2	2	3	2	3	2	3	3	2	2	3	3	3	2	2	2	2	2	3	3	3	3	2	2	2	2	84
103	2	3	1	2	2	3	3	2	2	2	1	2	3	2	3	3	2	2	3	3	3	2	2	2	2	3	3	3	1	3	2	2	2	2	78
104	0	0	0	0	2	1	1	2	0	0	2	1	1	0	1	0	2	1	0	0	1	1	2	1	0	0	0	1	1	3	0	0	1	0	25
105	0	0	0	1	0	0	1	0	1	2	2	0	0	0	0	0	0	0	1	1	1	0	0	1	0	0	0	0	3	3	0	0	0	0	17
106	2	3	3	3	2	3	3	2	2	2	3	2	3	2	3	1	2	2	3	2	1	2	2	3	2	2	3	3	3	1	2	2	2	1	77
107	1	1	2	2	1	3	2	3	1	2	1	2	1	2	2	2	2	2	2	1	2	1	2	2	1	1	1	1	1	1	2	2	1	2	55
108	2	3	3	3	3	1	2	2	1	2	3	2	3	2	2	3	2	2	2	2	2	3	2	3	2	2	3	2	3	3	3	2	3	2	80
109	1	1	2	2	2	2	2	1	3	2	2	2	2	2	2	2	3	1	1	2	3	2	1	1	1	2	2	2	2	2	1	2	2	2	62
110	2	3	2	3	2	3	2	3	3	2	2	3	2	3	3	2	2	3	3	2	1	2	2	3	2	2	2	2	3	2	3	2	2	3	81
111	2	3	3	2	2	3	2	3	3	2	3	3	3	2	3	2	2	2	3	2	3	2	2	3	2	3	2	2	3	2	3	2	2	3	84
112	2	1	1	2	2	3	2	1	2	3	1	2	3	2	3	1	2	2	2	2	1	1	2	1	2	3	1	1	0	3	2	2	1	3	62
113	2	1	2	1	2	2	3	2	2	2	1	3	2	1	3	3	1	2	3	3	1	2	2	2	2	1	3	2	2	2	3	1	2	2	68
114	1	1	1	1	3	2	2	3	1	1	2	1	1	1	2	1	3	2	3	1	3	2	2	2	2	2	1	2	2	2	2	1	3	2	61
115	0	1	0	0	1	1	0	1	0	0	1	0	0	0	1	1	1	0	1	0	1	1	1	1	1	1	0	1	0	1	0	0	1	1	19
116	2	1	1	2	2	2	2	2	1	2	2	2	3	2	3	2	1	2	1	1	1	2	2	2	1	2	2	2	1	1	3	2	2	1	60
117	2	1	3	1	2	3	1	2	2	2	3	2	1	2	1	3	2	2	3	1	3	2	2	2	2	2	3	1	3	3	2	2	2	2	70
118	2	2	2	3	1	2	2	3	3	3	2	2	2	3	3	2	2	2	2	2	2	2	3	0	2	3	2	2	1	2	2	1	1	3	71
119	2	2	2	2	3	2	3	2	2	3	2	2	2	3	3	3	3	3	3	3	2	2	3	2	3	3	2	2	2	3	3	3	2	3	85
120	1	1	2	2	2	1	1	2	2	2	1	2	2	1	2	2	2	2	2	1	1	1	2	2	1	1	1	1	1	1	2	2	1	2	52
121	2	2	2	2	1	2	2	1	1	1	2	1	2	1	1	2	1	1	1	1	2	2	1	2	1	1	1	2	2	2	2	1	2	2	52
122	1	2	2	2	2	2	3	2	2	2	2	3	2	1	2	2	2	1	1	2	1	3	3	1	3	1	2	2	1	1	1	1	2	2	62
123	1	3	2	2	2	3	1	2	2	2	3	2	3	3	2	2	2	2	2	3	3	1	2	2	3	3	1	1	3	1	2	2	2	2	72
124	2	3	3	3	2	3	3	2	2	2	3	2	3	2	3	3	2	2	3	3	3	2	2	2	2	2	3	3	3	3	2	2	2	2	84
125	2	3	3	3	2	3	3	2	2	2	3	2	3	2	3	3	2	2	3	3	3	2	2	2	2	2	3	3	3	3	2	2	2	2	84
126	2	1	1	1	2	1	1	2	2	2	1	2	1	2	2	1	2	2	2	2	1	1	2	1	2	2	1	1	1	2	2	2	2	2	54
127	2	1	2	0	1	0	1	1	2	1	1	1	0	2	1	2	0	1	2	1	0	1	0	2	1	0	1	1	0	3	3	0	2	1	37
128	0	0	1	0	1	1	1	2	0	0	1	0	0	1	0	0	0	0	0	0	0	1	1	1	0	1	0	0	2	1	0	0	1	0	16
129	2	0	1	1	1	1	0	2	3	0	2	3	0	1	1	2	0	0	2	0	0	1	0	0	1	1	2	2	1	1	2	0	2	2	37
130	3	2	2	2	3	2	2	3	3	3	2	3	2	3	2	2	3	3	2	3	2	3	3	2	3	3	2	2	2	2	3	3	3	3	86
131	2	2	3	3	2	2	2	1	2	3	2	3	3	2	1	1	3	2	1	3	1	2	2	2	2	2	3	2	2	2	2	3	2	2	72
132	2	2	2	2	3	2	3	2	2	3	2	2	2	3	3	3	3	3	3	3	2	2	3	2	3	3	3	3	2	3	2	3	2	2	85
133	1	2	2	2	1	2	2	1	1	1	2	1	2	1	2	2	1	1	2	2	2	1	1	1	1	1	2	2	2	2	1	1	1	1	50
134	2	0	0	0	0	0	2	3	1	1	0	2	0	0	2	1	0	1	2	1	0	2	0	0	1	0	1	2	0	2	1	1	1	2	31
135	2	0	1	0	1	1	1	2	3	2	2	3	0	1	1	1	0	2	1	1	0	2	1	2	0	1	2	2	1	1	1	2	0	3	43
136	1	2	1	2	2	2	2	1	2	3	2	3	2	2	2	1	1	3	1	2	1	3	3	1	2	3	2	2	2	2	1	1	2	3	65
137	2	3	3	3	2	3	3	2	2	2	3	2	3	2	3	3	2	2	3	3	3	2	2	2	2	2	3	3	3	3	2	2	2	2	84
138	2	2	3	1	3	2	2	1	3	1	2	2	2	3	1	3	3	1	3	2	2	2	1	3	2	2	2	3	2	2	3	3	2	1	72
139	2	2	2	2	1	2	2	3	2	3	2	1	1	2	2	3	1	2	3	1	1	3	0	2	1	2	2	2	2	2	3	1	2	2	64
140	1	1	1	2	1	1	2	1	1	1	0	2	1	2	2	0	1	2	1	2	2	1	1	2	1	1	2	2	2	0	1	0	2	1	43
141	0	0	0	1	0	0	0	0	0	0	0	0	1	0	0	1	0	0	0	0	0	1	1	0	0	0	0	1	0	0	0	0	0	0	6
142	1	2	1	1	1	2	1	1	0	1	0	1	1	2	1	0	1	2	1	1	0	0	1	2	0	2	1	2	2	0	1	1	1	0	34
143	2	2	1	2	1	1	2	1	0	1	1	2	1	2	3	1	2	3	0	0	2	1	0	2	0	1	1	1	2	3	0	3	1	0	45
144	2	1	1	1	1	1	1	0	2	2	2	1	2	3	2	1	2	1	3	1	1	1	2	2	0	1	2	2	1	2	1	0	2	2	49
145	1	1	1	2	2	1	2	1	1	1	1	1	1	1	3	1	1	2	1	2	1	1	0	1	1	2	1	1	0	2	0	2	2	1	42
146	2	2	1	2	2	1	1	2	2	3	2	2	2	2	1	1	2	1	2	2	1	2	2	2	2	1	2	1	2	1	2	2	1	2	58
147	0	0	1	0	0	0	1	2	0	1	1	2	1	0	0	0	0	0	1	0	0	0	0	0	1	0	1	1	1	1	0	1	1	1	18
148	1	2	2	2	2	2	2	2	1	2	2	2	2	2	2	2	2	2	2	2	2	2	2	2	2	2	2	2	2	1	2	2	2	2	65
149	0	0	0	0	0	0	0	0	0	0	0	0	0	0	0	0	0	0	1	0	0	1	0	0	0	0	0	0	0	0	0	0	0	0	2
150	1	3	3	2	2	2	1	1	1	2	2	1	3	3	1	1	2	3	1	2	2	1	2	3	3	2	2	2	2	1	3	3	1	1	65
151	1	2	2	1	2	1	2	1	2	2	1	2	1	2	2	1	2	1	2	1	2	2	1	2	1	2	1	2	2	1	2	1	1	1	52
152	1	0	0	0	0	0	0	1	2	0	0	1	0	0	0	0	0	0	2	3	0	0	0	0	0	0	1	1	0	2	0	0	1	1	16
153	2	2	2	3	2	2	3	2	2	2	1	3	3	2	2	1	2	2	3	3	3	1	3	3	2	2	2	2	3	3	1	1	2	2	74
154	2	1	1	2	0	1	1	2	2	2	1	1	2	1	0	3	2	1	1	2	0	2	0	1	1	2	2	2	3	2	1	1	2	2	49
155	2	2	2	2	2	2	2	1	1	0	1	1	2	0	1	0	2	2	1	1	0	2	1	2	1	1	3	2	2	2	2	1	2	1	49
156	2	1	1	1	2	1	1	2	2	2	1	2	3	2	1	3	2	2	1	2	1	2	2	1	2	2	2	2	1	3	1	2	2	3	60
157	1	2	1	1	3	1	3	3	2	2	1	1	2	0	1	3	2	0	2	1	2	2	2	1	1	1	1	3	2	3	1	2	2	1	56
158	0	0	0	0	1	1	0	0	0	1	0	0	1	0	0	0	0	0	0	0	0	0	0	0	0	0	0	0	0	0	0	0	0	0	4
159	0	0	0	1	3	1	1	0	0	0	0	0	1	0	1	0	0	0	1	1	2	3	3	0	0	0	0	1	0	3	0	0	3	0	25
160	0	0	0	0	1	1	1	1	0	0	0	0	0	0	1	0	0	0	1	0	1	2	1	1	0	0	0	1	0	1	0	0	2	0	15
161	0	0	0	0	1	1	0	1	0	0	0	0	0	0	1	1	1	0	2	1	0	1	1	1	0	1	0	1	1	0	0	0	2	0	17
162	1	1	2	2	2	3	2	1	3	1	2	2	2	1	3	2	1	1	1	2	1	2	2	2	3	1	2	1	2	2	2	2	2	1	60
163	0	1	1	1	2	1	1	3	1	0	2	2	0	0	1	3	1	0	2	2	1	2	0	1	1	0	1	1	1	3	0	0	1	2	38
164	0	0	1	1	2	1	0	1	0	0	1	1	0	0	1	0	0	0	3	1	3	2	2	0	0	0	1	1	1	1	0	0	2	0	26
165	2	1	2	2	2	3	1	2	3	2	2	2	2	3	3	2	3	1	1	2	1	2	2	3	1	3	3	1	2	3	2	2	2	2	70
166	0	0	0	0	1	0	0	1	0	0	0	0	0	0	0	0	0	0	0	0	0	0	0	0	0	0	0	0	0	0	0	0	1	0	3
167	3	3	3	3	3	3	3	3	3	3	3	2	3	3	3	3	3	3	3	3	3	3	3	3	3	3	3	3	3	3	3	3	3	3	101
168	0	0	0	0	0	0	0	0	0	0	0	0	0	0	0	0	0	0	0	0	0	0	0	0	0	0	0	0	0	0	0	0	0	0	0
169	1	2	1	2	2	2	2	1	2	2	1	3	2	2	2	1	1	1	1	2	1	2	2	2	1	2	1	2	2	2	1	1	2	1	55
170	2	1	1	1	1	0	2	2	1	0	1	1	1	0	1	3	0	0	3	1	0	2	1	2	0	0	3	2	1	2	2	1	2	2	42
171	3	2	3	3	0	3	3	3	3	3	3	3	3	3	3	3	3	2	3	1	3	1	1	1	3	1	3	3	3	3	3	3	3	3	87
172	0	0	1	2	1	2	1	0	1	1	2	0	0	0	1	0	0	0	1	2	1	1	1	0	1	0	1	0	3	2	0	0	1	1	27
173	0	0	0	0	0	0	0	0	0	0	0	0	0	0	0	0	0	0	0	0	0	0	0	0	0	0	0	0	0	0	0	0	0	0	0
174	1	2	0	2	2	1	0	2	1	1	2	0	2	1	2	0	1	3	0	1	1	1	2	1	1	1	1	1	2	1	2	3	1	0	42
175	1	3	3	1	2	1	2	1	3	2	2	3	2	1	3	2	2	3	3	2	3	2	2	3	2	2	1	2	3	2	1	2	2	3	72
176	1	1	1	2	2	1	1	1	2	1	2	1	1	0	1	1	1	1	1	1	1	2	2	1	1	0	2	1	2	2	1	2	2	1	43
177	0	1	0	1	1	0	0	1	0	0	1	0	1	0	0	1	2	0	1	1	0	3	2	1	0	0	0	0	1	0	0	0	2	0	20
178	3	2	1	0	1	1	1	3	1	1	2	3	0	0	2	1	2	2	2	1	1	1	0	1	1	1	0	1	1	2	1	0	2	0	41
179	3	2	2	2	2	2	2	3	1	1	2	2	2	3	2	2	3	1	1	1	3	3	1	2	1	2	1	3	2	1	2	3	2	2	67
180	0	1	0	0	2	0	0	1	0	0	0	0	1	0	0	0	2	0	0	0	1	0	0	0	0	0	0	1	1	1	0	1	1	0	13
181	3	3	1	3	2	2	2	2	2	2	2	3	3	3	3	3	3	3	3	2	3	2	2	2	2	2	1	2	3	3	3	1	3	3	82
182	0	0	1	1	2	1	0	1	0	1	1	2	0	2	2	1	1	1	1	1	1	1	2	1	1	1	1	2	2	1	1	1	1	1	36
183	1	1	1	1	0	0	2	1	1	2	1	2	2	2	0	2	1	0	1	3	2	2	1	2	2	1	2	2	2	3	1	2	2	1	49
184	2	1	1	1	1	1	2	2	2	1	1	2	1	1	2	2	1	1	2	2	1	2	1	2	1	1	2	2	1	2	2	1	2	2	51
185	0	0	0	0	1	0	0	1	0	0	1	0	0	0	0	0	1	0	1	0	1	0	1	0	0	0	0	0	0	1	0	0	1	0	9
186	0	0	0	0	0	0	0	0	0	0	0	0	0	0	0	0	0	0	0	0	0	0	0	0	0	0	0	0	0	0	0	0	0	0	0
187	1	0	0	0	0	0	2	2	2	0	0	2	0	0	2	2	0	0	2	3	0	2	0	2	0	0	1	2	1	1	1	0	1	2	31
188	1	1	1	2	2	1	3	2	2	1	1	0	1	1	1	2	1	1	1	1	2	2	1	2	1	2	3	1	2	1	2	1	0	2	48
189	0	0	1	2	0	0	2	0	1	1	1	0	1	0	0	0	0	0	1	1	0	1	0	0	0	0	0	1	2	1	0	0	1	0	17
190	0	0	0	0	2	1	0	1	0	0	3	0	0	0	0	0	1	0	2	0	2	3	2	1	0	1	0	0	0	2	0	0	2	0	23
191	1	1	0	0	0	0	1	1	1	0	0	1	0	0	1	1	0	0	1	1	0	1	0	0	0	0	1	1	0	1	0	0	0	0	14
192	0	0	0	1	1	0	0	0	0	0	1	0	1	0	0	1	1	0	1	1	1	1	1	1	1	1	0	2	1	1	0	0	1	1	20
193	2	2	2	0	2	2	1	2	2	2	1	1	1	1	1	1	0	2	2	1	1	1	2	2	1	1	1	1	1	0	2	1	1	0	43
194	0	0	0	0	2	0	0	1	0	0	1	0	0	0	0	1	1	0	0	0	0	0	0	1	0	1	0	0	0	1	0	0	2	0	11
195	1	0	1	2	1	1	3	3	1	1	2	2	3	0	0	2	3	2	0	1	0	0	0	3	1	3	0	2	1	3	0	2	1	0	45
196	1	1	2	2	1	3	3	2	2	2	0	2	1	1	2	0	2	2	1	2	0	2	2	1	1	2	0	1	1	1	2	2	2	1	50
197	0	0	0	0	1	1	0	1	0	0	0	0	0	0	1	0	1	0	1	0	1	1	1	1	0	0	1	1	0	1	0	0	1	1	15
198	2	0	0	1	0	1	1	3	3	1	1	3	0	0	3	3	0	0	2	1	0	2	0	3	0	0	2	2	1	1	2	1	2	2	43
199	2	1	2	2	1	1	2	1	1	1	2	3	2	1	1	1	1	1	1	0	2	3	1	2	1	3	2	1	2	2	1	0	2	1	50
200	1	1	1	1	2	1	1	1	1	1	1	0	1	1	1	1	1	1	1	1	1	1	1	1	1	1	1	1	1	1	1	1	3	1	36
Participants	Human condition																																		SCORE
	Fear subtotal																	Avoidance subtotal
	Q1	Q2	Q3	Q4	Q5	Q6	Q7	Q8	Q9	Q10	Q11	Q12	Q13	Q14	Q15	Q16	Q17	Q1	Q2	Q3	Q4	Q5	Q6	Q7	Q8	Q9	Q10	Q11	Q12	Q13	Q14	Q15	Q16	Q17
1	1	2	1	1	2	1	2	3	2	2	3	2	2	1	2	2	3	2	2	1	1	2	2	1	1	1	2	2	2	1	1	2	2	1	58
2	2	3	2	3	3	3	2	3	2	3	2	3	2	2	3	3	3	2	3	2	3	3	2	2	2	3	2	2	3	2	3	2	3	3	86
3	1	1	1	0	1	0	1	0	0	1	1	0	0	1	1	0	1	1	1	1	0	0	0	1	1	1	0	1	1	1	1	1	1	1	23
4	2	1	2	2	3	1	3	3	2	3	2	2	3	2	1	3	1	1	2	3	2	2	2	1	2	2	1	2	2	1	2	1	2	1	65
5	1	1	1	2	2	2	2	2	2	2	2	1	1	1	1	1	2	3	1	2	2	1	1	0	1	1	1	2	3	1	2	2	1	0	50
6	1	1	1	2	1	2	1	2	1	1	2	1	1	0	1	0	1	1	1	1	2	0	3	2	2	1	3	1	1	2	1	1	1	1	43
7	0	0	3	0	0	3	0	3	0	3	3	3	3	3	3	0	0	0	0	3	0	3	3	0	0	0	0	3	0	0	0	3	3	3	48
8	0	3	1	1	2	1	2	2	2	2	2	3	1	3	0	2	2	1	3	2	1	0	3	1	1	1	3	2	0	1	2	2	1	2	55
9	2	2	2	3	2	3	3	3	3	2	3	2	3	3	2	3	3	3	3	2	3	3	3	3	2	2	3	3	3	2	2	3	3	2	89
10	0	1	2	0	0	0	0	0	0	3	3	3	3	0	1	0	0	0	0	3	0	0	0	0	0	0	0	0	0	0	0	0	0	2	21
11	1	0	1	1	0	1	1	1	0	1	1	1	1	1	1	0	1	0	1	1	1	0	1	1	1	1	0	1	2	1	1	0	0	1	26
12	2	1	2	1	3	3	3	1	2	3	2	3	1	3	3	3	3	3	3	2	2	2	3	3	2	2	3	3	2	2	2	3	2	2	80
13	3	2	3	2	2	3	3	3	2	2	3	2	3	3	2	2	2	2	3	2	3	2	2	3	2	3	2	2	3	3	3	2	2	3	84
14	1	0	2	2	2	2	1	3	2	2	3	2	2	3	3	1	2	1	0	2	2	2	2	2	2	1	2	1	2	2	0	2	2	3	61
15	0	1	2	2	1	3	0	2	0	2	2	2	1	0	2	0	0	0	0	1	3	0	3	0	1	1	2	0	0	1	0	0	0	1	33
16	1	0	1	2	2	2	0	2	1	3	2	2	3	3	2	1	3	3	2	2	1	3	1	2	2	1	3	2	1	3	2	1	2	1	62
17	2	2	2	1	2	2	2	2	2	2	2	2	2	1	2	1	2	2	2	2	2	1	3	2	2	2	3	2	0	2	1	2	0	1	60
18	3	2	3	2	2	3	3	3	2	2	3	2	2	3	2	3	2	2	3	3	2	2	2	2	2	3	3	2	3	3	3	2	2	3	84
19	1	2	3	1	2	3	2	3	3	2	3	2	2	3	2	2	3	2	2	1	3	2	2	3	3	3	2	2	2	3	1	2	3	3	78
20	1	0	2	1	1	3	1	3	1	2	2	2	2	2	3	2	1	0	1	2	2	3	3	1	1	0	2	3	1	3	0	2	3	3	59
21	1	1	1	0	1	1	0	0	0	0	1	2	1	0	1	0	0	1	1	2	1	0	1	1	0	1	1	0	0	0	0	1	0	0	20
22	2	2	3	1	3	2	1	2	3	3	3	1	3	2	1	3	1	1	3	2	2	1	3	3	3	2	2	3	2	2	3	2	3	2	75
23	0	1	1	0	1	1	1	1	1	0	0	1	0	1	1	1	0	0	1	0	0	1	1	1	0	0	0	1	0	0	0	1	0	0	17
24	2	0	1	2	0	2	1	1	1	2	3	1	2	3	1	1	2	1	0	1	2	3	2	2	2	1	0	1	1	2	0	2	2	2	49
25	0	0	2	0	0	1	1	2	0	1	1	1	1	0	2	2	0	0	0	1	1	2	2	0	1	0	2	0	0	1	1	0	1	2	28
26	2	2	3	2	2	3	3	3	3	2	3	2	2	3	2	3	2	2	3	3	2	2	2	2	2	3	3	2	3	3	3	2	2	3	84
27	2	1	0	1	1	0	2	1	1	1	2	1	1	1	1	1	1	1	1	1	2	1	1	1	0	0	1	2	2	1	2	1	2	1	38
28	1	1	2	1	1	0	1	2	1	1	0	0	0	1	1	2	0	0	0	1	1	1	1	2	1	0	0	0	1	1	1	0	1	2	28
29	2	2	3	1	1	2	0	1	1	1	2	2	3	2	2	2	1	0	2	3	1	3	1	0	1	0	2	3	0	2	1	1	3	1	52
30	2	1	1	2	2	1	2	1	2	2	2	1	1	2	1	1	2	2	2	1	1	1	2	2	2	1	1	1	3	1	2	2	1	1	52
31	1	1	1	1	1	1	0	2	2	2	1	1	2	1	2	2	0	2	1	0	1	1	2	0	0	2	2	0	2	0	0	2	1	1	38
32	2	2	2	1	3	3	0	2	1	2	2	2	3	2	1	2	2	2	1	2	2	3	2	2	2	2	1	1	2	2	2	2	2	2	64
33	3	2	3	3	2	3	2	3	2	2	3	2	2	3	2	2	3	2	2	3	3	2	2	3	3	3	2	2	2	3	3	2	2	3	84
34	1	0	1	1	0	1	1	1	3	0	2	1	2	2	1	0	2	2	1	1	2	2	2	2	0	1	1	1	1	0	1	1	2	0	39
35	1	2	3	1	2	2	3	3	2	2	3	2	2	1	2	3	1	2	2	3	1	1	1	1	1	1	2	1	2	3	3	2	2	3	66
36	3	3	2	1	2	2	2	2	2	0	1	2	2	3	1	2	1	1	3	0	0	0	0	1	1	1	2	0	2	2	2	1	1	0	48
37	0	1	1	0	1	1	1	1	1	0	1	0	0	0	0	1	2	1	1	1	1	0	0	2	2	0	2	0	1	1	0	2	1	1	27
38	3	2	1	2	2	3	3	3	2	2	2	2	1	3	3	3	3	3	3	1	3	1	2	3	2	3	3	2	2	3	3	2	2	3	81
39	1	0	0	1	2	0	2	1	1	1	1	1	0	1	1	1	2	2	1	1	2	1	1	0	1	1	1	1	2	0	1	1	2	2	36
40	0	1	1	0	1	0	0	1	0	2	0	0	0	0	1	0	0	0	0	0	1	0	0	0	0	1	1	0	0	1	0	0	0	0	11
41	3	2	3	3	2	3	2	3	2	2	3	2	2	3	2	2	3	2	2	3	3	2	2	3	3	3	2	2	2	3	3	2	2	3	84
42	0	1	0	1	0	0	0	0	0	0	0	0	1	1	1	0	0	0	1	0	0	1	0	1	0	0	1	0	0	0	1	0	0	0	10
43	1	3	1	1	0	2	1	2	0	2	2	2	2	1	1	0	0	2	1	1	0	1	1	2	0	2	0	3	0	2	2	2	1	1	42
44	3	2	1	3	2	1	3	3	2	2	3	2	1	1	2	3	1	2	1	2	2	2	2	1	2	1	2	2	2	3	1	2	2	3	67
45	0	2	1	2	1	1	0	0	1	0	1	0	1	0	0	1	1	1	2	1	1	0	0	1	1	1	0	0	1	0	1	1	1	1	25
46	0	1	0	1	1	0	1	0	1	1	0	1	1	0	1	0	0	1	1	0	1	1	1	0	0	0	1	1	0	0	0	1	1	0	18
47	3	2	3	2	2	3	3	1	2	2	2	1	3	3	2	2	2	2	3	2	3	2	2	1	2	1	2	2	1	3	3	2	2	2	73
48	3	2	3	2	2	2	1	2	2	2	3	3	2	1	2	3	2	2	3	2	2	1	2	2	2	3	1	2	1	3	1	2	2	2	70
49	3	2	3	3	1	2	1	2	2	2	2	3	1	3	1	2	3	2	2	3	1	3	3	2	2	1	3	2	2	1	3	2	2	2	72
50	2	3	1	2	1	1	1	3	3	2	3	2	2	1	2	3	2	1	3	1	2	2	2	2	2	2	1	2	1	3	2	2	2	3	67
51	2	2	2	1	2	3	1	3	3	3	3	3	3	0	0	1	3	2	3	2	2	2	2	0	2	2	3	2	3	2	1	3	2	2	70
52	2	2	1	2	2	1	1	3	1	2	2	2	1	2	2	1	1	2	2	2	2	2	2	1	2	1	1	2	1	1	1	2	2	3	57
53	1	2	1	1	2	2	2	3	3	2	1	2	2	1	2	2	3	1	2	3	2	1	2	2	1	1	1	1	2	2	3	2	2	1	61
54	2	2	1	1	2	1	2	2	2	0	2	0	1	2	1	3	1	1	2	1	1	1	2	1	1	1	2	2	2	0	1	1	1	1	46
55	2	2	3	3	2	2	1	2	1	2	3	3	2	3	2	2	1	3	1	2	2	3	2	2	2	3	3	2	2	3	2	2	2	2	74
56	1	0	2	0	0	2	0	1	0	3	0	1	1	0	2	1	0	0	0	3	2	2	0	0	1	0	0	0	0	1	0	0	0	3	26
57	2	3	2	1	1	1	2	1	3	1	2	2	1	1	2	2	3	1	2	2	2	2	2	2	1	2	1	1	2	2	2	2	2	1	59
58	0	0	0	0	2	1	1	0	0	2	0	1	0	0	0	0	0	1	0	0	1	0	1	0	0	0	1	1	0	0	0	0	0	0	12
59	1	2	1	3	2	2	3	3	2	2	3	2	2	1	2	2	3	3	1	1	1	2	2	3	2	1	2	2	2	3	3	2	2	3	71
60	1	2	0	1	1	1	0	1	0	1	0	2	1	2	1	1	2	1	1	1	2	0	1	1	1	2	1	1	1	1	1	1	1	1	35
61	1	1	3	0	1	1	1	0	2	2	3	0	2	2	2	1	0	1	1	1	0	1	2	0	2	0	1	2	1	0	0	1	1	1	37
62	3	2	2	3	3	3	2	2	2	3	2	3	3	3	1	2	3	2	2	2	1	2	2	3	3	2	2	2	2	2	3	3	2	2	79
63	0	0	0	1	0	1	1	1	0	0	0	0	0	0	0	0	0	0	0	0	1	0	0	0	0	0	0	1	0	0	0	0	0	0	6
64	3	1	3	3	2	2	2	2	2	2	2	2	1	1	1	2	2	3	2	1	3	1	3	1	1	1	2	3	1	2	2	1	2	2	64
65	1	2	2	1	2	1	2	2	2	2	2	1	2	2	1	1	1	2	1	1	2	2	1	2	2	1	1	2	2	1	1	2	1	2	53
66	2	3	3	2	1	3	3	1	3	2	1	2	2	3	2	1	2	1	1	3	2	2	2	2	2	2	3	2	3	1	2	2	2	1	69
67	2	1	2	1	2	2	1	1	1	1	2	1	2	2	1	2	1	2	2	3	2	1	1	2	2	2	1	2	2	2	1	3	2	2	57
68	0	1	1	1	1	1	0	1	1	1	0	1	1	1	0	1	0	1	1	2	0	0	1	1	1	0	1	1	1	1	2	0	2	1	28
69	2	1	2	2	1	1	1	1	1	1	1	0	3	1	1	2	3	2	2	2	3	2	0	0	2	2	2	2	1	1	0	0	2	2	49
70	3	2	3	3	2	2	2	2	2	2	1	2	2	2	2	2	3	2	2	3	3	3	3	3	3	3	2	3	2	2	3	3	3	1	81
71	0	1	2	0	1	2	0	2	1	3	2	2	1	2	2	1	1	1	0	2	0	3	1	0	1	0	1	2	0	2	0	1	1	3	41
72	0	1	0	1	0	1	1	1	0	2	0	0	1	0	1	0	0	1	1	1	0	0	2	1	0	1	1	0	0	2	0	1	1	1	22
73	3	3	1	1	2	2	2	1	3	2	3	3	1	2	2	3	2	2	3	2	2	3	1	2	1	1	3	2	2	1	2	3	2	1	69
74	0	0	1	0	0	1	0	0	0	0	1	0	0	0	1	1	0	0	0	0	1	1	1	0	1	0	0	0	1	1	1	0	0	0	12
75	2	2	1	2	1	2	2	2	1	2	2	1	3	2	3	3	2	2	3	2	2	3	1	2	1	3	3	2	3	2	3	1	3	2	71
76	1	1	2	3	1	2	1	2	2	1	1	2	2	2	1	2	2	2	1	1	2	3	2	2	2	2	1	1	2	2	2	1	1	1	56
77	3	2	2	2	2	1	2	3	2	3	3	2	2	2	1	2	2	2	3	1	1	2	2	3	1	3	2	2	3	2	1	3	2	3	72
78	1	0	2	0	1	2	0	3	1	2	2	2	2	3	3	1	0	1	1	3	0	2	3	0	0	0	1	3	1	2	0	2	2	2	48
79	0	0	0	0	0	2	0	0	0	0	1	0	1	0	0	0	0	0	0	0	1	0	0	1	2	0	0	0	0	2	2	0	0	0	12
80	0	2	1	1	1	1	1	2	1	2	0	1	1	1	1	1	0	0	1	1	2	2	1	1	1	2	2	1	1	0	1	1	1	0	35
81	2	3	2	2	3	2	2	2	3	3	2	3	3	2	3	3	2	3	2	2	2	3	3	2	3	2	3	3	3	2	2	3	3	2	85
82	2	2	2	3	3	2	2	2	2	2	3	3	3	1	3	3	2	3	3	2	2	3	2	3	2	2	2	2	2	3	3	2	2	2	80
83	1	1	2	1	1	1	1	2	1	2	2	2	2	0	1	0	0	1	0	2	0	0	1	1	1	1	1	1	1	1	1	0	2	1	35
84	2	2	1	2	1	1	1	1	3	2	1	1	2	1	2	1	2	2	1	1	3	2	3	2	2	3	1	3	2	1	3	2	2	2	61
85	2	2	1	1	2	2	1	1	2	2	2	2	1	2	1	2	2	1	2	2	2	1	2	2	1	1	1	2	2	1	1	1	2	2	54
86	3	2	3	3	2	2	2	2	2	2	2	2	3	2	2	2	3	2	2	3	3	3	3	3	3	3	2	3	2	2	3	3	3	3	85
87	1	2	3	3	2	3	2	1	2	2	1	2	2	3	2	2	1	2	2	3	1	2	2	3	3	3	2	2	2	3	1	2	2	1	70
88	1	1	1	1	2	1	1	2	1	2	1	1	1	1	1	2	1	2	1	1	1	1	2	0	2	1	2	1	2	2	2	1	1	2	45
89	0	0	1	0	0	0	0	0	0	1	0	0	0	0	1	0	0	0	0	0	0	0	0	0	0	0	0	0	0	1	0	0	0	0	4
90	2	2	2	2	3	2	0	3	2	3	3	3	2	3	2	3	3	3	2	2	3	2	3	3	2	2	2	0	2	3	3	2	2	3	79
91	1	2	1	1	2	3	3	1	2	2	2	0	2	3	0	2	3	2	3	1	1	2	1	1	3	1	2	3	3	3	1	3	2	1	63
92	3	2	3	3	2	3	2	3	2	2	3	2	2	3	2	2	3	2	2	3	3	2	2	3	3	3	2	2	2	3	3	2	2	3	84
93	2	1	3	2	3	3	2	1	1	2	1	2	2	2	2	1	2	3	2	3	2	2	2	2	1	2	1	2	1	2	2	3	3	1	66
94	2	2	1	2	2	2	2	2	3	2	2	2	3	2	2	2	2	2	3	2	3	3	1	2	2	3	2	2	3	2	3	3	2	1	74
95	2	3	3	2	2	3	2	3	3	2	3	2	2	3	2	3	2	3	3	3	2	2	2	2	3	3	3	2	3	3	2	2	2	3	85
96	0	0	1	0	1	0	0	0	0	1	0	0	0	0	0	0	0	0	0	0	0	0	0	0	0	0	1	0	0	0	0	0	0	0	4
97	2	2	1	2	2	1	2	1	2	1	1	1	1	1	1	2	2	2	2	1	2	1	1	2	2	2	2	1	2	1	2	1	1	1	51
98	1	2	1	1	2	1	2	1	2	2	2	1	1	2	1	2	1	1	2	2	1	2	2	3	1	1	2	2	2	1	2	2	2	2	55
99	0	3	3	2	2	2	3	3	0	3	1	3	0	1	3	0	1	1	2	2	2	1	3	2	3	2	3	3	1	3	2	1	1	2	64
100	1	1	1	1	1	1	0	2	1	1	2	1	1	1	2	1	2	1	1	1	1	0	0	2	2	2	1	0	1	2	1	1	1	1	38
101	3	2	3	3	2	3	2	3	2	2	3	2	2	3	2	2	3	2	2	3	3	2	2	3	3	3	2	3	2	3	3	2	2	3	85
102	3	2	3	3	2	3	2	3	2	2	3	2	2	3	2	2	3	2	2	3	3	2	2	3	3	3	2	2	2	3	3	2	2	3	84
103	2	3	2	1	1	2	2	2	2	1	2	1	1	2	3	2	1	1	2	2	1	3	1	1	1	2	2	2	2	2	2	3	1	2	60
104	0	1	1	1	1	1	0	1	0	1	1	1	0	0	2	2	0	1	0	0	2	2	1	1	0	1	2	0	1	0	1	0	1	1	27
105	0	0	1	0	0	1	0	0	0	0	1	0	1	0	0	0	0	0	0	0	0	0	0	0	1	1	0	1	0	1	0	0	0	0	8
106	3	2	3	3	2	3	2	3	2	2	3	2	2	3	2	2	3	2	2	3	3	2	2	3	3	3	2	2	2	3	3	2	2	3	84
107	1	2	2	1	2	2	2	1	2	1	2	3	2	2	1	2	1	2	2	1	3	3	1	1	1	1	2	1	2	2	1	1	2	2	57
108	2	2	2	2	2	3	3	3	3	3	3	3	3	2	3	3	2	3	3	2	2	2	2	2	2	1	3	2	3	3	2	2	2	2	82
109	1	2	3	2	2	1	2	2	2	2	3	2	2	1	1	1	1	3	2	1	2	2	2	1	1	1	2	2	2	2	2	2	2	2	61
110	3	2	2	1	2	2	3	3	3	3	2	3	3	2	3	2	3	2	2	2	2	3	2	2	2	3	3	3	2	2	3	3	2	2	82
111	2	3	3	2	1	3	3	3	3	2	3	2	2	3	2	3	2	3	3	3	2	2	2	2	2	2	3	2	3	3	2	2	2	3	83
112	1	0	1	1	2	1	1	1	2	2	3	2	2	2	3	2	2	2	3	1	1	2	0	2	2	1	3	2	0	2	3	1	3	2	58
113	2	1	3	2	1	3	1	3	1	2	3	2	2	3	2	1	2	1	1	3	2	2	2	2	2	2	1	2	1	3	2	2	2	3	67
114	2	2	3	3	3	2	2	3	2	3	3	2	3	2	2	3	2	3	2	2	2	2	2	3	3	3	2	3	2	3	2	2	2	2	82
115	1	1	1	0	1	1	1	0	0	1	1	1	0	0	1	1	0	1	1	1	1	1	1	1	0	1	1	1	1	0	1	1	0	1	25
116	1	2	1	1	2	1	3	2	1	2	2	2	2	2	2	2	2	2	1	1	1	2	1	2	2	1	3	1	2	2	1	1	2	3	58
117	3	2	3	3	2	3	3	1	2	2	3	2	2	3	2	2	3	2	1	3	1	2	2	3	2	3	2	2	2	3	1	2	2	1	75
118	2	1	1	3	1	2	2	3	3	2	2	3	3	3	3	2	2	1	3	2	2	2	3	2	2	2	3	2	2	1	2	2	2	2	73
119	2	1	2	2	1	2	1	2	1	1	2	1	1	2	1	1	2	1	1	2	2	1	1	2	2	2	1	1	1	2	2	1	1	2	50
120	1	1	2	2	1	2	1	2	2	1	2	1	1	2	1	2	2	2	1	2	1	1	1	1	2	2	2	1	1	2	2	1	1	2	51
121	3	2	3	2	2	2	2	2	3	2	2	2	2	2	2	3	3	2	2	3	2	3	3	2	3	3	3	3	1	2	3	1	1	3	79
122	1	2	1	1	2	1	1	3	2	2	3	2	2	2	2	2	3	2	1	1	3	2	2	1	2	1	2	2	2	2	3	1	2	1	62
123	3	3	3	3	3	3	2	3	2	2	3	2	2	3	2	2	3	2	2	3	3	2	2	3	3	2	2	2	2	3	2	2	2	3	84
124	1	2	2	1	2	1	2	1	2	1	1	2	2	2	1	2	1	2	2	1	1	2	2	1	1	1	2	1	2	2	1	1	2	2	52
125	3	2	3	2	2	3	3	3	2	2	3	2	2	3	2	3	2	2	3	3	2	2	2	3	2	3	2	2	3	3	3	2	2	3	84
126	2	2	1	2	2	1	2	1	1	2	1	2	2	1	2	1	1	2	2	1	2	2	2	2	1	1	1	2	2	1	1	2	2	1	53
127	1	2	2	1	2	1	1	2	2	2	1	1	2	0	1	1	1	1	0	2	1	2	1	2	0	1	2	1	2	1	1	0	0	1	41
128	0	2	1	1	2	1	1	0	1	2	1	1	1	0	2	0	0	0	1	2	1	1	0	1	0	1	1	2	1	0	1	1	1	1	31
129	0	0	2	0	0	1	1	2	0	2	2	2	2	2	2	0	0	0	1	2	1	1	2	0	1	0	0	1	0	1	1	3	2	2	36
130	2	3	2	2	3	2	3	2	3	3	3	2	2	2	3	3	2	3	3	3	2	3	3	2	2	2	3	3	3	2	2	3	3	2	86
131	3	1	1	3	2	2	2	2	2	2	3	1	2	1	2	2	3	2	2	2	3	3	2	2	2	2	3	2	2	2	1	2	2	2	70
132	3	3	2	2	3	3	2	3	2	3	2	3	2	3	2	3	3	2	2	2	2	2	3	2	3	2	3	2	3	3	2	2	2	2	83
133	2	1	2	2	1	1	1	1	1	1	1	1	2	1	1	1	2	1	1	2	2	2	2	2	2	2	1	2	1	1	2	2	2	2	51
134	0	0	1	0	0	1	0	1	0	1	1	1	1	2	2	0	1	0	0	1	0	1	2	1	0	0	0	0	1	1	1	2	2	2	26
135	1	1	1	1	1	1	1	2	0	0	1	2	1	0	1	2	2	2	0	3	0	0	0	1	2	2	2	1	2	1	0	2	1	1	38
136	1	2	1	2	2	2	3	3	2	2	1	2	2	2	2	1	2	2	1	1	2	1	3	2	2	1	3	2	3	2	3	1	3	3	67
137	3	2	3	3	2	3	2	3	2	2	3	2	2	3	2	2	3	2	2	3	3	2	2	3	3	3	2	2	2	3	3	2	2	3	84
138	1	2	2	1	3	3	2	1	2	1	2	3	1	2	2	2	3	2	2	2	3	2	2	2	1	2	3	3	2	2	3	3	2	3	72
139	1	1	1	1	1	1	1	0	2	2	1	1	0	1	0	0	1	0	1	1	0	1	2	1	2	0	1	1	2	0	1	1	1	1	31
140	2	1	2	1	2	1	2	1	1	1	1	0	0	1	2	0	1	2	2	1	1	1	2	3	1	1	2	2	2	1	0	0	2	1	43
141	0	2	2	0	0	3	0	0	3	3	3	2	3	2	3	0	0	1	0	1	0	0	2	0	0	3	0	0	0	0	0	0	1	2	36
142	1	1	3	2	1	0	1	1	1	2	2	0	1	1	1	2	0	1	1	1	1	1	1	0	1	2	1	0	1	2	0	1	0	1	35
143	1	2	0	0	2	2	2	3	3	2	3	1	2	2	1	0	1	3	0	0	0	1	2	1	1	1	2	3	0	2	1	1	1	2	48
144	2	3	2	3	1	2	2	2	3	1	2	2	3	2	2	1	1	1	2	2	2	1	1	2	1	2	1	2	2	1	2	2	1	1	60
145	3	1	2	2	2	2	3	2	2	2	2	1	2	2	1	2	2	2	2	2	1	3	3	2	2	2	3	2	2	2	3	3	2	2	71
146	3	2	2	3	2	2	2	2	2	2	2	2	2	2	2	2	2	2	2	2	3	2	2	3	2	2	2	2	2	2	3	2	2	2	73
147	0	0	1	1	0	1	0	1	0	0	1	1	0	0	0	0	0	1	0	0	1	2	2	1	0	0	1	0	1	0	0	0	1	0	16
148	2	1	2	2	1	2	2	2	2	2	2	2	2	2	2	2	1	2	2	2	1	2	2	2	2	2	2	2	2	2	2	2	2	2	64
149	0	0	1	0	0	0	0	3	0	2	0	3	0	1	1	0	0	0	0	0	0	2	2	0	0	0	0	0	0	0	0	1	0	0	16
150	3	2	2	3	2	2	3	3	2	2	3	3	3	2	2	3	2	3	2	3	3	2	2	2	3	2	2	2	2	2	3	2	3	2	82
151	1	2	2	2	2	2	2	1	2	2	2	1	2	2	2	2	2	1	2	1	2	2	2	2	2	2	2	1	2	2	1	2	1	2	60
152	0	0	0	0	0	0	1	0	0	1	0	1	1	0	1	1	1	0	1	0	0	1	1	0	1	0	0	3	1	0	0	1	1	0	17
153	2	3	3	2	2	2	2	2	3	2	1	3	2	3	2	2	3	2	2	2	1	3	2	3	3	3	2	2	3	2	2	3	2	3	79
154	2	0	1	2	0	1	2	1	1	2	3	1	2	2	2	1	3	2	1	0	2	2	2	1	2	0	2	2	2	1	1	0	1	1	48
155	1	2	2	1	0	2	2	2	2	1	2	2	1	2	0	2	1	2	2	2	1	1	1	1	1	1	2	1	2	0	1	2	1	1	47
156	3	2	3	3	2	3	2	3	2	2	3	2	2	3	2	2	3	2	2	3	3	2	2	3	3	3	2	2	2	3	3	2	2	3	84
157	2	3	2	2	3	2	1	2	2	2	2	2	2	1	2	1	1	2	1	2	2	1	2	2	1	3	2	1	1	1	2	1	1	2	59
158	0	0	0	0	0	0	0	0	0	0	0	0	0	0	0	0	1	0	0	0	1	0	0	0	0	0	0	0	1	1	0	0	0	0	4
159	0	2	2	1	2	1	0	1	1	2	2	2	1	1	2	1	1	2	1	0	1	1	1	1	1	2	1	0	1	1	1	1	1	1	39
160	0	0	1	0	0	0	0	0	0	1	0	0	0	0	1	0	0	0	0	0	0	0	0	0	0	0	0	0	0	0	0	0	0	0	3
161	0	0	1	0	0	1	0	1	0	1	1	1	1	1	1	0	0	0	0	1	0	1	1	0	0	0	0	1	0	1	0	1	1	1	17
162	1	2	2	1	2	2	1	1	2	2	2	3	1	3	1	2	1	2	2	2	1	2	3	3	2	1	2	2	2	2	3	2	2	2	64
163	0	0	0	1	0	0	0	1	0	0	0	0	0	0	0	0	0	0	1	0	1	0	1	0	1	1	1	0	0	1	0	1	1	0	11
164	0	2	1	0	1	1	0	0	0	1	0	0	0	0	2	0	0	0	0	0	0	0	0	0	1	1	0	0	0	1	1	0	0	1	13
165	1	2	1	2	2	2	2	2	2	2	2	2	2	2	2	1	2	2	2	1	2	1	3	1	1	1	2	3	1	2	3	1	3	3	63
166	0	0	0	0	0	0	0	0	0	0	0	0	0	0	0	0	0	0	0	0	0	0	0	0	0	0	0	0	0	0	0	0	0	0	0
167	3	3	3	3	3	3	3	3	3	3	3	3	3	3	3	3	3	3	3	3	3	3	3	3	3	3	3	3	3	3	3	3	3	3	102
168	0	0	0	0	0	0	0	0	0	0	0	0	0	0	0	0	0	0	0	0	0	0	0	0	0	0	0	0	0	0	0	0	0	0	0
169	2	2	2	2	1	1	1	2	2	1	2	1	2	2	1	2	1	2	2	1	1	2	1	1	2	2	1	2	2	1	1	2	1	2	53
170	2	2	1	2	1	2	1	2	1	2	2	3	2	2	3	1	2	1	1	3	2	2	1	2	2	2	1	1	1	1	2	2	1	1	57
171	3	2	3	2	3	3	3	3	3	3	3	3	3	3	1	3	3	2	3	2	3	3	2	3	3	3	3	1	2	2	3	3	3	2	90
172	0	1	1	0	1	1	0	0	0	1	1	0	0	0	1	0	0	0	0	0	1	0	0	1	1	1	0	0	0	1	0	0	0	0	12
173	0	0	0	0	0	0	0	0	0	0	0	0	0	0	0	0	0	0	0	0	0	0	0	0	0	0	0	0	0	0	0	0	0	0	0
174	2	3	3	2	1	2	1	2	1	2	2	3	1	2	1	1	2	1	1	2	2	1	3	2	2	2	3	2	3	2	2	1	3	2	65
175	2	2	1	2	2	3	3	3	3	2	3	2	2	1	2	1	2	1	2	1	2	2	2	2	1	3	3	2	1	3	3	2	2	3	71
176	0	0	1	0	1	2	1	2	1	2	2	1	1	2	2	1	0	1	1	2	1	1	1	1	1	1	0	1	1	2	1	1	2	2	39
177	1	1	0	1	1	0	0	0	0	0	1	0	0	1	1	0	0	0	0	1	0	0	0	0	1	1	0	0	1	0	0	0	1	0	12
178	1	0	1	0	1	1	1	0	1	1	2	0	1	1	1	2	1	1	1	1	2	2	2	1	1	1	2	1	1	1	0	1	1	1	35
179	1	2	1	2	2	1	3	1	2	2	1	3	3	2	2	1	2	2	1	2	2	2	2	1	2	1	2	1	1	2	1	1	2	1	57
180	0	0	0	0	1	0	0	0	0	1	0	0	0	0	0	0	0	0	0	0	0	0	0	0	0	0	0	0	0	0	0	0	0	0	2
181	3	3	2	2	2	2	2	2	2	3	2	3	2	2	2	3	0	2	2	1	2	3	3	3	2	2	2	3	3	3	3	2	3	3	79
182	3	2	0	3	3	0	2	1	3	1	1	1	0	0	1	2	2	2	2	1	2	0	0	2	3	2	3	1	3	0	3	0	1	0	50
183	2	1	2	1	1	1	1	2	1	3	1	1	2	3	1	0	1	0	2	2	1	2	2	1	2	0	2	1	2	2	1	1	2	2	49
184	1	1	2	1	1	2	1	2	1	2	2	2	2	2	2	1	1	1	1	2	1	2	2	1	1	1	1	2	1	2	1	2	2	2	51
185	0	0	0	0	0	1	1	0	0	0	0	0	0	0	0	1	0	0	0	0	1	1	1	0	0	0	1	1	0	0	0	0	0	0	8
186	0	0	0	0	0	0	0	0	0	0	0	0	0	0	0	0	0	0	0	0	0	0	0	0	0	0	0	0	0	0	0	0	0	0	0
187	1	0	1	0	1	1	0	1	0	1	1	1	1	1	1	0	0	0	0	1	0	1	1	0	0	0	0	1	0	1	0	1	1	1	19
188	2	1	2	1	1	3	1	1	2	1	1	1	1	1	1	1	1	1	1	1	2	1	1	1	1	1	1	1	1	1	2	1	1	2	42
189	1	0	0	1	0	1	0	1	2	0	2	1	2	0	0	1	0	1	0	1	1	0	0	1	1	0	1	0	0	1	0	0	0	0	19
190	1	1	2	0	1	1	1	0	0	0	0	0	1	0	0	0	0	0	0	2	0	0	1	0	0	1	1	1	0	0	0	0	0	0	14
191	1	1	1	1	1	1	1	1	1	1	1	1	1	1	1	1	1	1	1	1	1	1	1	1	1	1	1	1	1	1	1	1	1	1	34
192	1	2	2	2	2	3	1	2	1	1	2	2	1	1	2	0	1	1	2	1	2	0	1	1	1	2	1	1	1	2	1	2	1	1	47
193	0	2	2	3	2	1	1	1	1	1	1	2	0	2	1	2	1	1	2	1	2	2	2	2	2	1	1	1	2	2	2	1	1	2	50
194	3	3	0	3	3	3	3	3	3	3	3	3	3	3	3	3	3	3	3	3	3	3	3	3	3	0	3	3	3	3	3	3	2	3	95
195	0	1	0	1	0	3	2	1	2	1	1	0	2	0	1	2	0	0	0	0	2	3	2	1	1	0	3	2	0	1	1	1	0	1	35
196	1	2	1	2	1	2	0	2	2	2	1	1	2	1	2	1	1	1	2	2	1	1	0	0	1	2	2	1	2	2	1	2	1	1	46
197	0	0	1	0	0	1	0	1	0	1	1	1	1	0	1	0	0	1	0	1	0	1	1	0	0	0	0	0	0	0	0	0	0	1	13
198	0	0	2	0	0	1	0	2	0	2	1	2	2	2	2	0	0	0	0	2	1	2	2	1	1	0	0	2	0	1	1	2	2	1	34
199	2	1	1	2	1	1	2	1	0	2	1	2	2	1	2	1	2	1	3	1	1	3	2	1	1	2	2	1	1	3	3	2	2	3	56
200	0	0	0	0	0	0	0	0	0	0	0	0	0	0	0	0	0	0	0	0	0	0	0	0	0	0	0	0	0	0	0	0	0	0	0
Participants	Robot condition																																		SCORE
	Fear subtotal																	Avoidance subtotal
	Q1	Q2	Q3	Q4	Q5	Q6	Q7	Q8	Q9	Q10	Q11	Q12	Q13	Q14	Q15	Q16	Q17	Q1	Q2	Q3	Q4	Q5	Q6	Q7	Q8	Q9	Q10	Q11	Q12	Q13	Q14	Q15	Q16	Q17
1	1	1	2	2	3	3	2	2	3	1	2	2	2	2	1	2	3	2	2	2	2	1	1	3	2	2	1	2	1	1	2	2	2	1	63
2	2	3	2	2	3	3	3	3	2	3	3	2	2	3	2	2	3	3	2	3	2	3	2	2	3	2	3	3	3	3	3	3	2	3	88
3	1	1	1	0	1	1	1	1	0	1	0	1	0	1	0	1	0	1	1	1	1	1	1	1	1	1	1	1	1	0	1	1	1	1	27
4	2	3	2	3	2	3	2	2	2	2	2	2	2	3	2	2	3	1	3	2	3	1	2	1	1	1	2	3	1	1	1	2	1	2	67
5	2	2	2	1	1	2	2	1	1	2	2	1	1	2	2	1	2	1	0	3	1	1	3	1	1	1	2	2	1	3	1	1	2	1	52
6	1	1	1	2	1	1	1	3	0	1	2	2	3	1	3	0	1	1	1	1	1	0	1	1	1	2	0	1	1	3	1	1	0	1	41
7	0	3	3	0	0	0	0	0	0	3	0	3	3	0	0	3	3	0	3	0	3	3	0	0	0	0	0	3	3	3	0	3	3	3	48
8	3	1	2	1	1	1	1	2	2	2	2	3	2	2	2	1	1	3	2	2	1	2	3	3	3	3	3	2	0	3	2	2	2	3	68
9	2	3	3	3	2	2	2	2	2	2	3	2	3	3	3	2	2	3	2	2	3	2	1	2	3	2	2	2	3	3	2	3	2	3	81
10	0	0	0	0	0	0	0	0	0	0	0	0	0	0	0	0	0	0	0	0	0	0	0	0	0	0	0	0	1	0	1	0	0	0	2
11	1	2	2	0	0	0	0	0	0	2	0	1	2	0	0	1	2	1	1	0	1	1	0	1	0	0	0	0	2	2	0	1	2	2	27
12	2	1	1	3	2	2	2	2	2	2	1	3	2	3	3	3	3	3	3	1	2	2	3	2	2	3	3	2	3	2	3	2	2	3	78
13	2	2	3	2	3	3	2	2	3	2	2	2	2	2	2	2	3	3	2	2	3	3	3	3	3	2	3	3	3	3	2	3	2	3	85
14	2	2	0	1	2	1	2	2	2	1	1	1	2	2	2	2	2	1	2	2	2	1	1	1	3	1	1	1	3	1	0	2	1	2	52
15	0	0	0	2	0	0	0	0	0	0	0	0	2	0	2	0	0	0	0	0	0	0	0	0	0	0	0	0	0	2	0	0	0	0	8
16	0	2	1	2	1	3	2	2	1	3	2	2	2	2	3	3	3	3	1	3	1	2	3	1	3	2	1	1	2	3	3	2	3	3	71
17	0	0	1	0	1	0	0	0	0	1	0	0	0	0	1	1	1	1	1	0	1	1	0	0	0	0	0	1	1	1	0	2	1	0	16
18	2	2	3	3	3	2	2	3	2	2	2	2	2	2	2	2	3	2	3	3	3	3	3	3	3	3	2	3	2	3	2	3	3	2	85
19	2	2	3	2	3	3	3	3	2	2	2	3	2	1	3	3	1	2	1	3	3	2	2	2	3	3	2	3	2	3	1	3	3	2	80
20	0	0	0	0	0	0	0	0	0	0	0	0	0	0	0	0	0	0	0	0	0	0	0	0	0	0	0	0	0	0	0	0	0	0	0
21	0	0	1	1	1	1	1	0	0	0	0	0	1	1	1	0	0	0	0	0	1	0	0	1	1	0	0	1	1	1	1	0	1	0	16
22	1	3	3	2	3	1	3	1	1	3	3	2	3	2	3	3	3	1	3	2	3	3	3	2	3	1	1	3	3	3	3	2	3	3	82
23	0	0	1	1	1	1	0	0	1	0	0	0	0	0	0	1	1	1	0	1	1	0	0	1	0	0	1	1	0	0	1	1	0	1	16
24	0	1	1	1	1	3	2	2	3	0	2	0	0	2	2	1	0	2	0	2	0	0	3	1	2	2	2	1	1	1	2	1	1	0	42
25	2	2	2	0	1	2	0	1	1	1	0	2	1	0	1	1	2	2	0	2	1	1	1	0	0	1	0	1	1	2	0	1	1	1	34
26	3	2	3	2	3	2	2	3	2	2	2	3	3	2	2	3	2	2	2	2	3	2	3	3	3	2	3	2	2	2	2	2	2	3	81
27	1	1	1	1	0	1	1	2	1	1	1	1	0	1	2	2	1	1	1	1	1	1	1	2	1	2	1	1	2	1	1	2	0	1	38
28	1	2	0	0	0	1	1	1	0	1	1	2	0	2	0	0	1	0	1	0	0	2	2	1	2	1	0	1	0	0	0	0	2	0	25
29	3	1	3	0	1	1	2	0	1	2	2	3	1	2	2	1	2	2	2	2	1	2	1	1	1	2	0	2	3	2	2	2	2	1	55
30	1	1	1	1	3	2	2	1	2	2	2	2	2	2	1	2	2	1	2	1	2	3	2	1	1	2	1	2	1	1	1	1	2	2	55
31	1	1	2	1	1	0	1	1	2	1	2	2	1	2	2	2	1	1	1	1	2	1	0	2	0	1	2	2	2	2	1	0	0	2	43
32	2	1	2	2	2	2	2	1	1	2	1	2	2	1	2	2	1	2	2	2	2	1	1	2	2	2	1	2	2	1	2	1	2	1	56
33	2	2	3	3	3	2	2	3	2	2	2	2	3	2	2	2	3	2	3	3	3	3	3	3	3	3	2	3	2	2	2	3	3	2	85
34	0	1	1	1	3	1	1	1	0	1	1	2	2	1	2	2	1	1	1	2	1	2	2	0	1	1	1	1	0	2	1	1	1	0	39
35	2	1	2	1	3	2	2	3	2	2	2	2	2	2	2	2	3	2	1	1	1	1	1	1	3	1	2	3	2	3	2	3	3	2	67
36	2	2	1	2	1	2	1	2	3	2	3	2	2	2	1	1	1	1	2	1	3	3	3	3	2	1	2	0	1	3	1	3	3	1	63
37	3	0	1	2	0	1	1	0	1	1	1	2	1	1	0	1	0	0	0	1	0	2	0	2	1	0	0	0	1	0	0	2	1	1	27
38	2	0	0	1	0	2	1	1	3	2	2	2	2	0	1	1	1	2	2	2	3	1	1	2	2	2	1	2	3	1	2	1	1	1	50
39	2	2	3	2	1	2	2	2	1	3	0	0	2	2	2	2	1	1	3	1	2	2	1	1	1	2	2	3	2	3	1	3	2	3	62
40	1	1	2	0	0	0	1	0	0	1	0	2	2	0	0	0	0	0	1	0	1	0	1	1	0	0	0	0	1	1	1	0	0	1	18
41	3	2	3	3	3	2	2	3	2	2	2	3	3	2	2	3	2	2	3	3	3	2	3	3	3	3	2	2	2	2	2	2	3	2	84
42	0	0	0	1	0	1	1	0	0	1	1	1	1	0	0	0	0	0	0	0	1	0	1	0	0	0	0	1	0	0	0	0	1	1	12
43	0	0	1	1	3	0	1	1	2	2	2	0	0	3	1	1	1	0	1	0	1	1	3	2	2	1	0	0	0	1	2	0	0	1	34
44	2	3	3	2	2	2	2	3	2	2	1	2	1	2	3	2	2	2	2	1	1	3	3	1	2	3	2	1	2	2	2	3	2	1	69
45	1	2	1	1	1	2	1	2	1	1	0	1	1	2	0	1	0	1	0	3	0	2	1	0	1	2	1	0	1	0	1	0	0	1	32
46	0	1	0	1	1	0	0	1	0	1	0	0	0	0	0	0	1	0	0	1	0	1	1	1	1	1	0	1	1	1	0	1	0	1	17
47	2	1	2	1	1	2	2	2	3	2	2	2	2	2	2	2	3	2	3	3	1	3	3	1	3	2	1	3	2	3	2	3	2	1	71
48	3	2	3	2	3	3	2	2	3	2	2	3	1	2	3	1	2	3	2	2	3	2	1	3	2	2	1	2	2	2	2	2	2	3	75
49	3	2	1	2	2	2	2	3	2	3	3	1	3	3	3	3	2	2	2	1	2	2	2	3	3	3	2	2	1	2	2	2	2	3	76
50	2	2	1	1	2	1	1	2	2	1	2	1	3	1	2	2	2	3	1	2	2	2	2	2	3	3	2	3	3	2	3	1	3	2	67
51	2	0	3	3	2	3	3	2	3	3	0	3	2	3	3	0	0	1	2	2	2	2	2	2	0	2	2	2	3	3	0	0	2	0	62
52	2	1	0	0	1	2	2	1	1	1	1	2	1	0	1	0	1	0	1	1	0	0	1	1	2	1	0	0	0	0	2	0	0	1	27
53	2	1	2	2	1	2	2	2	1	1	3	2	2	2	1	1	3	3	2	1	2	2	2	1	2	2	2	2	1	3	3	1	2	3	64
54	1	0	1	0	1	1	0	0	0	0	0	2	2	0	1	1	1	1	0	0	1	1	0	1	0	0	1	1	0	0	0	0	0	1	18
55	2	2	2	2	2	1	3	2	1	2	1	2	2	3	3	2	1	1	2	2	2	3	2	2	2	2	3	1	1	3	1	3	1	2	66
56	2	0	0	0	0	1	0	2	0	0	0	0	1	0	1	1	0	0	1	0	0	0	1	0	0	0	1	0	1	0	0	0	0	0	12
57	2	1	2	3	2	2	2	2	2	2	3	2	3	1	2	3	2	1	2	3	3	2	2	3	2	2	2	2	2	2	2	3	2	3	74
58	0	0	0	0	0	0	1	0	0	2	0	0	1	0	1	0	0	1	0	0	0	0	0	0	0	0	0	0	0	0	0	1	0	1	8
59	2	3	2	2	1	2	2	2	2	1	2	2	3	2	3	2	2	3	2	3	2	3	3	1	2	3	2	3	3	3	2	3	2	1	76
60	2	1	1	1	2	1	1	2	1	1	1	0	2	1	2	1	1	1	1	1	2	1	1	2	1	1	0	1	1	1	0	1	2	2	40
61	1	2	1	1	2	2	1	1	2	2	2	1	1	1	2	1	2	0	1	1	1	0	0	2	3	1	0	0	2	0	1	0	1	0	38
62	2	2	3	2	2	2	3	2	3	3	2	3	2	3	2	2	2	3	2	3	2	3	2	2	3	2	2	2	2	2	2	3	2	3	80
63	0	0	0	1	0	0	0	0	0	0	0	1	1	0	0	0	0	1	0	0	0	0	0	0	0	1	0	0	0	0	0	1	0	0	6
64	2	2	3	3	1	2	2	1	2	2	2	2	2	2	2	2	1	3	3	3	1	3	3	1	1	3	2	1	2	2	2	3	1	2	69
65	3	3	2	2	3	2	2	3	3	2	2	2	3	2	3	3	2	2	2	3	3	3	3	3	2	2	3	2	3	2	2	2	3	2	84
66	3	2	3	3	3	2	2	3	2	2	2	3	1	2	2	1	2	2	3	3	1	2	1	3	1	3	2	2	2	2	2	2	1	2	72
67	2	2	3	1	1	1	1	2	2	1	2	2	2	2	2	3	3	2	2	2	2	2	2	2	3	3	2	3	3	2	3	2	2	2	71
68	1	0	0	2	1	2	2	1	1	0	2	1	1	2	2	0	1	2	1	2	0	1	2	2	1	2	2	1	0	0	1	0	1	1	38
69	1	0	1	1	2	1	1	0	0	1	1	1	1	1	3	2	2	2	2	1	2	1	2	2	2	1	2	2	1	2	0	0	0	1	42
70	3	2	1	1	1	2	2	3	2	2	2	3	3	2	2	1	2	2	1	3	3	2	3	3	3	3	2	2	2	2	2	2	3	2	74
71	3	2	2	0	0	0	1	1	1	3	1	2	2	1	1	2	2	0	3	0	2	3	0	0	0	0	2	2	2	3	1	2	3	2	49
72	3	0	1	0	2	0	0	0	1	0	0	2	1	1	0	1	1	1	0	1	1	0	1	1	1	0	1	1	1	0	0	1	1	0	24
73	2	3	2	2	2	2	2	3	3	2	3	3	1	1	3	2	2	2	3	1	2	2	2	1	2	2	3	3	2	3	3	3	2	1	75
74	1	0	1	1	0	0	0	1	0	1	0	0	2	0	0	0	2	0	0	0	2	0	1	0	0	0	0	0	2	1	0	0	0	1	16
75	2	2	3	2	2	3	2	2	3	3	3	2	3	2	2	3	1	3	2	2	2	2	2	1	1	2	1	3	1	2	3	3	1	3	74
76	2	1	2	1	2	2	1	1	2	1	1	2	2	1	2	2	1	2	2	1	0	1	2	2	1	2	2	1	1	1	1	2	2	1	50
77	2	2	3	2	3	2	2	3	1	2	2	3	2	2	3	1	2	3	2	3	3	2	1	3	1	3	2	3	1	1	2	2	2	3	74
78	2	2	1	0	0	1	2	0	1	2	1	1	1	1	1	1	2	0	2	0	2	2	1	1	0	0	0	2	1	2	1	1	1	1	36
79	2	0	0	0	0	1	0	2	0	0	0	0	0	0	0	0	1	0	0	0	0	0	2	2	0	0	0	0	0	1	1	0	1	0	13
80	1	1	2	2	0	1	1	1	1	2	1	1	1	1	1	2	1	1	0	2	1	2	1	2	1	1	2	0	1	2	2	1	1	0	40
81	2	3	2	2	2	3	3	2	3	3	3	2	2	3	3	2	3	3	2	2	2	3	2	2	2	2	3	3	3	3	3	3	2	3	86
82	2	3	2	2	2	2	3	3	2	3	3	3	2	3	1	2	2	2	3	2	2	3	3	2	3	3	1	2	2	1	2	3	2	1	77
83	1	1	1	1	2	0	1	1	0	1	1	1	1	1	1	0	0	1	1	0	1	1	1	1	1	1	1	0	1	1	1	1	2	1	30
84	2	2	2	1	2	2	1	1	2	1	1	2	2	2	2	1	1	2	2	2	2	1	1	2	1	2	1	2	2	1	1	1	2	1	53
85	2	1	2	2	2	1	1	2	2	1	2	2	1	1	1	1	1	1	1	2	1	2	2	1	1	1	2	2	2	2	2	1	2	2	52
86	3	2	3	3	3	3	2	2	2	2	2	3	3	2	2	3	2	3	3	3	3	2	3	3	3	3	2	2	2	2	2	2	3	2	85
87	3	2	1	2	2	1	3	2	1	2	1	1	3	3	3	3	2	3	1	2	3	2	2	2	2	2	3	2	2	2	1	2	3	2	71
88	2	1	2	0	0	0	0	0	0	2	0	1	1	0	1	2	2	0	2	1	1	1	0	0	0	1	0	1	1	1	0	1	2	2	28
89	0	0	0	0	0	0	0	0	0	0	0	0	0	0	0	0	0	0	0	0	0	0	0	0	0	0	0	0	0	0	0	0	0	0	0
90	3	3	2	2	3	3	3	2	2	3	3	2	2	2	3	3	3	0	2	2	2	2	3	2	2	3	3	2	2	2	2	0	3	2	78
91	1	2	1	1	3	2	2	3	1	2	2	1	1	2	2	3	2	3	1	1	1	1	1	1	3	2	2	2	2	2	2	3	3	2	63
92	3	2	3	3	3	2	2	3	2	2	2	3	3	2	2	3	2	2	3	3	3	2	3	3	3	3	2	2	2	2	2	2	3	2	84
93	2	1	2	3	3	2	2	1	2	3	2	2	2	2	2	2	3	2	2	3	2	1	1	3	1	1	2	3	1	3	2	1	2	3	69
94	1	2	1	2	3	2	2	3	3	2	2	2	2	2	1	3	3	2	3	1	3	1	3	3	2	2	2	2	2	2	2	2	3	2	73
95	2	2	3	3	3	2	2	3	2	2	2	2	3	2	2	2	3	2	3	3	3	3	3	3	3	3	2	3	2	2	2	3	3	2	85
96	1	0	0	0	0	0	0	0	0	0	0	0	0	0	1	0	0	0	0	0	0	0	0	1	0	0	0	0	1	0	0	0	0	0	4
97	1	1	1	0	0	1	0	0	0	1	0	1	1	0	0	1	1	0	1	0	1	1	0	0	0	0	0	1	1	1	0	1	1	1	18
98	1	1	1	2	2	2	1	1	1	1	1	3	1	1	2	2	2	2	1	1	2	1	1	2	1	2	1	2	2	2	2	2	2	1	52
99	3	1	2	2	0	1	2	3	1	2	0	2	2	2	3	2	1	3	1	1	2	1	1	2	1	2	2	2	2	3	2	3	1	2	60
100	1	1	1	1	0	1	0	0	0	1	0	1	1	1	0	2	0	0	1	0	1	1	0	0	1	1	0	2	2	0	0	0	1	1	22
101	3	2	3	3	3	2	2	3	2	2	2	3	3	2	2	3	2	2	3	3	3	2	3	3	3	3	2	2	2	2	2	2	3	2	84
102	2	2	3	3	3	2	2	3	2	1	1	3	3	2	2	3	2	2	2	1	2	2	3	1	3	1	2	1	1	2	2	3	2	3	72
103	1	3	2	3	3	2	2	2	2	1	2	3	3	2	2	3	2	3	2	3	2	2	1	3	1	3	2	2	1	2	2	2	2	1	72
104	0	0	2	2	0	0	1	0	1	1	0	2	2	1	2	0	2	0	1	0	1	2	1	1	2	2	0	0	2	2	1	0	0	1	32
105	1	0	0	1	0	0	0	1	0	0	0	0	1	0	1	0	0	1	0	0	0	0	0	0	0	0	0	0	0	1	0	0	0	0	7
106	2	3	2	3	3	2	2	2	2	3	2	2	2	2	2	2	3	3	2	3	2	1	3	3	3	3	2	3	3	3	2	3	2	3	83
107	2	1	2	1	2	2	1	2	2	3	1	2	2	1	3	2	1	1	2	1	1	1	2	2	2	1	2	1	1	1	1	1	2	1	53
108	2	2	1	3	3	2	2	2	2	2	2	2	1	2	2	2	2	3	2	3	1	1	2	3	3	3	2	2	2	2	2	3	2	1	71
109	2	2	3	1	2	2	2	2	2	2	1	1	1	3	2	2	2	1	2	2	3	2	2	1	2	2	1	1	2	2	2	1	2	1	61
110	2	3	2	3	3	2	2	3	2	3	2	2	3	3	2	2	2	2	2	2	2	3	2	3	3	3	3	3	3	3	3	2	2	3	85
111	3	2	3	3	3	2	2	3	2	2	2	3	3	2	2	3	2	2	3	3	3	2	3	3	3	3	2	2	2	2	2	2	3	2	84
112	1	2	1	2	1	2	2	1	1	2	2	1	3	0	2	3	2	2	1	2	1	2	2	1	3	2	3	2	0	2	3	2	3	2	61
113	3	2	3	3	3	2	2	3	2	2	2	3	3	2	2	3	2	2	3	3	3	2	3	3	3	3	2	2	2	2	2	2	3	2	84
114	3	2	2	3	3	3	3	3	3	3	2	2	3	3	3	2	2	3	2	2	3	2	2	3	2	2	2	2	2	3	2	3	2	3	85
115	0	0	1	1	1	1	1	0	1	1	1	0	1	1	1	0	1	1	1	0	1	0	1	1	1	0	1	1	1	1	1	1	1	1	26
116	2	2	2	1	1	2	2	1	2	3	2	2	2	2	2	2	3	2	2	2	2	1	2	1	3	2	1	2	1	1	3	1	2	3	64
117	1	2	3	3	1	2	2	3	2	2	2	3	1	2	2	3	2	2	3	3	3	2	3	3	3	1	2	2	2	2	2	2	1	2	74
118	2	2	3	2	2	3	2	2	3	1	3	1	1	2	3	3	2	2	2	2	2	2	1	3	2	2	1	2	1	2	2	3	2	3	71
119	2	1	2	2	2	1	1	2	1	1	1	2	2	1	1	2	1	1	2	2	2	1	2	2	2	2	1	1	1	1	1	1	2	1	50
120	2	1	2	1	1	2	2	1	2	1	2	2	2	2	2	2	1	2	2	1	2	1	1	1	1	1	2	1	1	1	2	1	2	1	51
121	1	2	3	3	3	2	1	1	2	1	2	3	3	2	2	1	2	2	2	1	2	2	2	2	3	3	2	2	3	2	3	2	2	3	72
122	2	2	1	1	1	1	1	2	2	2	2	2	2	2	2	2	1	1	1	2	1	3	3	2	1	3	2	1	0	2	1	1	3	2	57
123	2	3	2	2	2	3	3	2	3	3	3	2	2	3	3	2	3	3	2	2	2	3	2	2	2	2	3	3	3	3	3	3	2	3	86
124	1	2	1	2	2	2	1	1	1	2	1	2	2	1	1	1	1	2	1	1	1	2	2	2	2	2	2	2	2	2	1	2	1	2	53
125	3	2	3	3	3	2	2	3	2	2	2	3	3	2	2	3	2	2	3	3	3	2	3	3	3	3	2	2	2	2	2	2	3	2	84
126	1	2	1	1	1	2	2	1	2	2	2	2	2	2	2	1	1	2	2	1	1	2	1	1	1	1	2	2	2	2	2	2	2	1	54
127	2	2	2	1	2	1	2	1	1	0	2	1	2	2	1	2	1	1	0	2	0	2	1	1	1	2	2	2	0	2	2	1	1	1	46
128	0	1	2	2	1	0	2	0	0	2	1	2	3	1	2	1	1	1	1	1	1	2	2	1	1	1	1	0	0	2	0	1	2	1	39
129	1	2	2	0	1	0	0	1	0	1	1	2	1	1	1	2	1	1	1	0	2	3	0	0	0	0	0	2	2	1	1	1	2	1	34
130	2	3	3	3	3	2	2	3	2	3	2	2	2	2	2	2	3	2	2	3	2	3	3	3	3	3	2	3	3	2	2	3	2	3	85
131	1	2	2	2	3	2	2	2	3	2	2	1	1	2	2	2	2	2	1	3	1	2	3	1	3	2	2	1	2	2	2	3	1	2	66
132	3	2	3	2	2	3	3	2	3	2	3	3	3	3	3	3	2	3	3	2	3	2	2	2	2	2	3	2	2	2	3	2	3	2	85
133	1	1	2	2	2	1	1	2	1	1	1	2	2	1	1	2	1	1	2	2	2	1	2	2	2	2	1	2	1	1	1	2	2	1	51
134	2	2	3	0	0	0	0	1	1	1	1	2	1	1	0	2	1	0	2	0	2	2	0	0	0	0	0	1	2	2	0	1	2	1	33
135	3	0	2	0	0	1	1	2	3	2	2	2	2	2	3	1	1	0	3	0	2	2	1	0	1	1	3	2	3	2	2	2	3	3	57
136	1	2	1	2	2	2	2	1	1	2	2	1	3	1	3	2	2	2	2	3	1	3	3	1	1	2	1	3	3	2	2	2	2	1	64
137	3	2	3	3	3	2	2	3	2	2	2	3	3	2	2	3	2	2	3	3	3	2	3	3	3	3	2	2	2	2	2	2	3	2	84
138	3	2	3	2	2	1	1	2	1	1	1	3	2	3	3	2	2	3	3	2	2	2	2	2	2	2	3	3	3	3	1	3	3	2	75
139	2	1	2	1	0	1	2	1	2	2	1	2	1	0	0	2	3	1	2	0	3	2	0	1	1	0	1	1	1	2	1	2	2	1	44
140	1	0	1	1	2	1	1	2	2	2	2	1	1	1	2	1	0	1	1	0	1	0	0	2	1	2	1	2	0	2	1	0	0	1	36
141	1	0	1	0	0	0	0	0	0	1	0	1	1	0	0	0	1	0	1	0	1	1	0	0	0	0	0	1	1	0	0	0	1	1	13
142	0	1	0	1	0	1	1	1	2	1	0	0	1	0	1	1	0	0	1	2	1	0	1	0	1	1	1	1	2	0	1	1	2	2	28
143	1	2	1	2	3	1	2	0	0	2	1	0	3	2	1	0	1	2	3	2	1	1	3	1	0	1	1	0	3	2	1	0	2	1	46
144	2	1	2	2	2	2	0	1	2	1	1	1	0	2	1	0	2	2	0	1	2	2	1	1	0	1	0	1	1	1	2	1	2	2	42
145	1	1	1	1	1	2	2	2	2	2	1	2	1	2	1	1	1	2	1	1	2	1	1	1	1	1	2	2	1	2	2	2	2	1	49
146	2	3	2	2	2	2	2	2	2	2	2	2	2	2	2	2	3	2	2	2	2	3	2	2	2	2	2	3	2	3	2	2	2	2	73
147	0	0	1	0	0	0	0	0	0	1	0	1	1	1	1	1	0	0	0	1	1	1	0	0	1	1	1	1	0	2	0	0	0	1	17
148	2	2	2	2	2	2	2	2	2	2	2	2	2	2	1	2	2	2	2	1	2	2	2	2	2	2	2	2	2	2	1	2	2	2	65
149	0	0	0	0	0	0	0	0	0	0	0	0	0	0	0	0	0	0	0	0	0	0	0	0	0	0	0	0	1	0	1	0	0	0	2
150	2	3	3	2	3	2	2	2	2	2	3	3	2	3	2	3	2	2	2	3	2	3	2	2	2	3	3	2	2	2	2	2	3	2	80
151	2	2	2	2	2	2	2	1	1	2	2	1	2	2	2	2	2	1	2	2	2	2	2	1	2	2	2	2	2	2	2	2	2	1	62
152	1	1	1	1	1	0	0	0	1	1	0	0	0	1	0	0	0	0	0	1	0	0	1	1	1	1	1	1	0	0	1	1	1	1	19
153	2	3	3	2	2	2	2	2	1	2	3	2	1	2	2	2	2	1	3	3	3	3	1	3	3	2	2	1	3	2	2	3	2	2	74
154	1	1	2	0	3	2	2	2	1	2	2	2	2	1	1	1	1	2	2	1	1	2	1	1	1	2	2	3	1	1	2	2	3	2	55
155	1	2	1	0	1	1	2	2	2	0	2	2	1	0	2	2	2	0	1	2	1	0	2	0	1	0	1	1	2	2	1	2	0	2	41
156	2	2	3	3	3	2	2	3	2	2	2	3	1	2	2	3	2	2	3	3	1	2	3	3	3	3	2	2	2	2	2	3	1	2	78
157	0	1	1	0	0	0	1	0	0	1	0	1	1	0	0	0	0	0	1	0	1	0	1	1	0	0	0	0	1	1	1	0	1	1	15
158	0	0	0	0	0	0	0	0	0	1	0	0	0	0	0	0	0	0	0	0	0	0	0	0	0	0	0	0	0	0	0	0	0	0	1
159	0	1	1	0	0	0	1	0	0	1	0	1	0	0	0	0	0	0	0	0	1	0	1	1	0	0	0	0	1	0	1	0	0	1	11
160	0	0	0	0	0	0	0	0	0	0	0	0	0	0	0	0	0	0	0	0	0	0	0	0	0	0	0	0	0	0	0	0	0	0	0
161	0	0	0	0	0	0	0	0	0	0	0	0	0	0	0	0	0	0	0	0	0	0	0	0	0	0	0	0	0	0	0	0	0	0	0
162	1	2	3	2	2	3	2	2	1	2	1	2	2	3	3	3	1	2	3	2	1	1	2	2	2	2	1	2	2	2	1	2	1	2	65
163	1	0	0	0	1	1	0	1	0	1	0	1	1	1	1	0	0	0	0	0	2	0	0	1	0	1	0	1	1	1	1	0	1	1	19
164	1	0	0	0	0	0	2	1	0	2	0	0	0	0	0	0	0	0	0	0	2	0	1	2	0	0	0	0	1	0	1	0	0	0	13
165	3	3	2	2	2	2	2	3	2	2	3	3	2	1	1	1	3	2	1	2	3	2	2	3	2	3	1	2	2	1	3	2	2	2	72
166	0	0	0	0	0	0	0	0	0	0	0	0	0	0	0	0	0	0	0	0	0	0	0	0	0	0	0	0	0	0	0	0	0	0	0
167	0	0	1	0	0	0	0	0	0	0	0	0	0	0	0	0	0	0	0	0	0	0	0	0	0	0	0	0	0	1	0	2	0	0	4
168	0	0	0	0	0	0	0	0	0	0	0	0	0	0	0	0	0	0	0	0	0	0	0	0	0	0	0	0	0	0	0	0	0	0	0
169	0	0	1	1	1	1	2	0	0	1	1	1	1	1	2	2	2	1	1	2	1	1	1	1	1	1	1	1	0	1	0	1	1	2	34
170	1	1	2	1	0	1	2	2	1	2	1	2	2	1	1	1	1	1	2	2	2	2	1	1	2	2	1	2	1	1	1	2	2	1	48
171	2	1	2	3	3	3	2	1	3	2	2	2	3	3	3	2	2	1	2	2	2	2	2	2	2	3	2	2	2	3	2	2	1	2	73
172	1	0	1	1	0	0	0	1	0	1	0	0	1	0	0	0	0	0	1	0	2	0	0	1	1	0	0	0	2	0	1	0	0	0	14
173	0	0	0	0	0	0	0	0	0	0	0	0	0	0	0	0	0	0	0	0	0	0	0	0	0	0	0	0	0	0	0	0	0	0	0
174	3	2	1	2	2	3	2	2	3	2	3	1	1	1	1	2	2	1	1	2	3	2	2	3	2	2	1	1	2	2	1	2	3	2	65
175	2	2	3	3	2	2	1	0	2	3	1	3	1	3	1	1	2	2	1	1	2	2	2	2	2	3	2	3	2	2	3	3	3	2	69
176	1	1	1	1	1	0	0	0	0	1	0	1	1	0	0	1	1	0	1	1	1	0	1	1	0	0	0	0	2	0	0	1	0	1	19
177	1	0	0	0	1	0	1	1	1	1	1	1	0	0	1	0	1	0	1	0	1	1	0	1	1	1	0	1	2	1	2	0	1	0	23
178	1	1	1	2	1	2	0	1	2	2	1	1	2	1	2	2	3	1	2	2	3	1	2	1	1	1	1	2	2	2	1	1	1	2	51
179	2	2	2	1	1	2	2	1	2	2	2	2	2	2	2	2	1	2	1	1	1	1	1	1	1	1	2	1	2	1	2	1	1	2	52
180	0	0	0	0	0	0	1	0	0	1	0	0	0	0	0	0	0	0	0	0	0	0	0	0	0	0	0	0	0	0	0	0	0	0	2
181	2	1	2	3	3	3	1	1	3	2	3	3	3	2	2	2	2	2	2	2	3	1	1	3	2	0	3	3	1	2	2	3	2	1	71
182	0	0	1	2	2	3	3	2	2	0	2	0	0	3	3	0	0	3	0	3	0	1	2	2	2	2	3	0	1	0	1	0	0	0	43
183	1	2	1	2	2	1	1	1	1	2	1	2	2	1	1	3	1	1	2	2	1	1	0	1	1	0	1	2	2	1	1	1	1	3	46
184	2	2	2	1	1	1	1	1	1	2	1	2	2	1	1	2	2	1	2	1	2	2	1	1	1	1	1	2	2	2	1	2	2	2	51
185	0	0	0	1	0	0	0	0	1	0	0	0	1	0	1	0	1	1	0	0	0	0	0	0	0	0	0	0	0	1	0	1	0	0	8
186	0	0	0	0	0	0	0	0	0	0	0	0	0	0	0	0	0	0	0	0	0	0	0	0	0	0	0	0	0	0	0	0	0	0	0
187	0	0	0	0	0	0	0	0	0	0	0	0	0	0	0	0	0	0	0	0	0	0	0	0	0	0	0	0	0	0	0	0	0	0	0
188	2	1	2	1	2	2	1	1	2	1	1	1	2	1	1	1	1	1	3	2	3	2	2	3	2	1	2	1	2	1	2	1	2	1	54
189	1	1	1	1	1	1	0	1	0	0	2	0	1	1	1	0	0	0	0	0	0	0	0	1	1	1	0	0	1	1	1	0	0	1	19
190	0	0	0	0	1	0	1	0	0	1	0	0	0	0	1	0	0	1	0	0	0	0	0	1	0	0	0	0	1	1	0	0	1	0	9
191	1	1	1	0	0	0	1	0	0	1	0	1	1	0	0	1	1	0	1	0	1	1	0	0	0	0	0	1	1	1	0	1	1	1	18
192	0	0	0	0	0	0	0	0	0	0	0	0	0	0	0	0	0	0	0	0	0	0	0	0	0	0	0	0	0	0	0	0	0	0	0
193	1	1	2	2	2	1	2	2	3	2	1	3	1	3	1	1	1	2	2	1	1	2	2	1	2	2	2	2	1	2	2	1	1	2	57
194	3	0	3	1	2	1	1	1	1	2	1	3	3	1	1	2	0	1	0	1	0	0	1	0	1	1	1	3	0	3	1	3	3	3	48
195	1	2	0	3	0	0	0	1	2	1	2	2	2	1	2	0	3	2	1	0	0	1	1	1	0	1	0	0	1	2	0	2	1	0	35
196	2	1	2	1	2	3	1	2	0	2	1	1	2	0	2	1	3	1	1	1	1	2	3	2	2	2	1	2	3	1	1	1	2	0	52
197	0	0	0	0	0	0	0	0	0	0	0	0	0	0	0	0	0	0	0	0	0	0	0	0	0	0	0	0	0	0	0	0	0	0	0
198	1	2	1	1	0	0	0	1	0	2	0	2	1	0	0	2	2	0	2	0	2	2	0	0	1	0	0	2	2	2	0	2	2	2	34
199	0	2	1	2	2	3	1	1	1	2	1	3	1	1	1	1	2	2	1	2	1	2	3	2	2	2	1	2	2	2	1	1	1	2	54
200	0	0	0	0	0	0	0	0	0	0	0	0	0	0	0	0	0	0	0	0	0	0	0	0	0	0	0	0	0	0	0	0	0	0	0

## Sheet: SoBA
Participants	Human condition				Score		Robot condition				Score
	Q1	Q2	Q3	Q4			Q1	Q2	Q3	Q4
1	3	4	3	4	14		4	4	3	4	15
2	4	5	5	5	19		4	5	4	3	16
3	4	4	4	4	16		4	4	4	4	16
4	5	4	4	4	17		4	4	5	4	17
5	4	3	2	3	12		3	4	3	2	12
6	1	2	2	1	6		4	5	4	5	18
7	5	5	5	5	20		4	4	4	4	16
8	2	1	3	4	10		4	4	2	2	12
9	5	5	5	5	20		5	5	5	5	20
10	2	1	1	1	5		5	5	5	5	20
11	5	5	5	5	20		5	4	4	4	17
12	4	3	5	5	17		4	5	4	5	18
13	5	4	5	4	18		5	4	5	4	18
14	4	5	4	5	18		2	2	5	4	13
15	4	4	5	4	17		5	4	5	5	19
16	3	5	4	4	16		5	4	3	5	17
17	4	4	3	4	15		4	4	4	4	16
18	5	4	5	4	18		5	4	5	4	18
19	4	5	5	5	19		4	5	4	3	16
20	4	4	4	4	16		4	4	4	4	16
21	1	1	1	2	5		5	5	5	5	20
22	3	4	5	4	16		5	1	5	4	15
23	4	4	3	4	15		3	4	4	5	16
24	3	4	4	4	15		2	2	1	2	7
25	4	4	5	5	18		5	5	5	5	20
26	5	4	5	4	18		5	4	5	4	18
27	4	4	5	5	18		5	5	5	5	20
28	3	5	4	4	16		5	5	5	5	20
29	4	5	4	3	16		5	4	3	4	16
30	4	4	4	4	16		4	4	4	4	16
31	4	3	4	4	15		3	4	4	3	14
32	5	5	4	5	19		5	5	5	5	20
33	5	4	5	4	18		5	4	5	4	18
34	5	5	5	5	20		5	5	5	5	20
35	5	4	5	4	18		5	4	5	4	18
36	2	3	3	3	11		3	5	3	4	15
37	5	5	4	4	18		4	5	5	4	18
38	4	5	3	3	15		3	3	4	4	14
39	4	5	5	5	19		4	5	5	4	18
40	4	4	4	4	16		3	4	3	4	14
41	5	4	5	4	18		5	4	5	4	18
42	5	4	4	4	17		4	4	5	4	17
43	3	3	4	4	14		4	4	5	5	18
44	5	4	4	4	17		4	3	4	5	16
45	5	4	4	4	17		4	4	4	3	15
46	5	4	5	4	18		5	4	5	4	18
47	5	4	4	4	17		4	4	4	5	17
48	5	4	3	4	16		3	4	5	4	16
49	5	4	5	4	18		4	5	4	5	18
50	3	2	3	4	12		4	3	4	5	16
51	5	3	5	3	16		5	4	3	5	17
52	5	5	5	4	19		4	4	4	5	17
53	3	4	4	4	15		5	4	3	4	16
54	4	5	5	5	19		5	5	5	5	20
55	5	4	4	4	17		4	3	4	5	16
56	4	3	5	5	17		4	5	4	5	18
57	4	5	4	3	16		5	3	4	4	16
58	4	4	1	4	13		3	5	5	5	18
59	5	4	5	4	18		5	4	5	4	18
60	4	4	5	3	16		4	4	5	4	17
61	4	5	4	4	17		5	4	5	4	18
62	3	4	4	4	15		4	4	4	3	15
63	4	4	4	4	16		4	4	4	4	16
64	5	4	5	4	18		5	4	5	4	18
65	5	4	5	4	18		4	4	5	5	18
66	5	4	5	4	18		5	4	5	4	18
67	5	4	4	4	17		5	4	4	5	18
68	4	5	5	5	19		5	5	4	5	19
69	3	4	3	4	14		4	4	3	5	16
70	5	4	5	4	18		5	4	5	4	18
71	5	4	5	4	18		5	5	3	5	18
72	5	4	3	5	17		4	5	4	5	18
73	5	4	5	4	18		4	4	5	4	17
74	4	3	4	3	14		4	4	4	4	16
75	5	4	4	4	17		5	4	5	4	18
76	5	4	5	4	18		4	4	4	4	16
77	5	4	3	3	15		4	3	4	5	16
78	5	4	4	4	17		5	4	4	4	17
79	5	4	5	5	19		3	5	5	5	18
80	4	4	4	3	15		3	3	4	4	14
81	4	5	4	5	18		4	5	4	5	18
82	4	4	5	5	18		5	5	4	4	18
83	4	4	4	4	16		4	5	4	4	17
84	3	3	4	4	14		4	2	3	4	13
85	3	3	4	4	14		4	4	3	4	15
86	5	4	5	4	18		5	4	5	4	18
87	5	4	4	4	17		4	4	5	4	17
88	4	5	5	5	19		5	5	5	5	20
89	4	4	4	4	16		4	4	4	4	16
90	4	4	5	5	18		4	5	4	5	18
91	5	4	5	4	18		4	5	4	5	18
92	5	4	5	4	18		5	4	5	4	18
93	5	4	3	4	16		3	4	5	4	16
94	5	4	2	4	15		3	4	5	4	16
95	4	5	4	5	18		5	4	5	4	18
96	5	5	5	5	20		5	5	5	5	20
97	4	4	4	4	16		4	4	4	4	16
98	2	4	5	3	14		3	4	3	2	12
99	5	5	5	5	20		5	5	5	5	20
100	5	4	4	4	17		4	5	5	5	19
101	5	4	5	4	18		5	4	5	4	18
102	4	3	4	3	14		4	3	4	3	14
103	4	3	4	3	14		4	3	4	3	14
104	5	5	5	4	19		4	4	4	5	17
105	3	3	4	5	15		4	4	3	4	15
106	5	4	5	4	18		4	4	5	3	16
107	4	3	4	3	14		4	3	4	3	14
108	3	4	4	4	15		4	4	5	4	17
109	5	4	4	4	17		4	3	4	5	16
110	5	4	5	4	18		5	4	5	4	18
111	5	4	5	4	18		4	5	4	5	18
112	4	5	4	3	16		5	4	4	5	18
113	5	5	4	4	18		5	4	5	4	18
114	5	5	5	5	20		5	5	5	5	20
115	4	4	5	4	17		5	5	5	5	20
116	5	4	3	4	16		5	4	3	4	16
117	5	3	4	4	16		5	4	5	4	18
118	3	4	4	4	15		4	4	3	4	15
119	4	3	4	3	14		4	3	4	3	14
120	4	3	4	3	14		4	3	4	3	14
121	3	4	3	4	14		4	3	4	3	14
122	5	4	5	4	18		5	4	5	5	19
123	5	4	5	4	18		4	5	4	5	18
124	4	3	4	3	14		4	3	4	3	14
125	5	4	5	4	18		5	4	5	4	18
126	4	3	4	3	14		4	3	4	3	14
127	4	4	3	4	15		3	5	5	4	17
128	5	5	4	4	18		4	4	4	5	17
129	4	4	4	4	16		4	3	4	3	14
130	4	5	4	5	18		4	5	4	5	18
131	4	3	4	3	14		5	4	5	4	18
132	4	5	4	5	18		4	5	4	5	18
133	4	3	4	3	14		4	3	4	3	14
134	4	4	3	4	15		4	4	4	4	16
135	2	4	3	3	12		4	4	3	4	15
136	5	5	5	5	20		4	5	4	5	18
137	5	4	5	4	18		5	4	5	4	18
138	5	5	4	4	18		5	5	3	4	17
139	5	5	5	5	20		5	5	5	5	20
140	4	3	4	4	15		3	3	4	2	12
141	4	4	4	4	16		4	5	4	4	17
142	5	5	5	5	20		5	5	5	5	20
143	5	4	5	4	18		4	5	4	5	18
144	5	5	5	5	20		5	5	5	5	20
145	3	4	4	4	15		4	4	4	4	16
146	5	4	4	4	17		4	4	4	4	16
147	4	4	4	4	16		2	4	4	4	14
148	4	4	4	4	16		4	4	4	4	16
149	4	4	4	4	16		4	4	4	4	16
150	4	5	5	4	18		5	4	4	5	18
151	3	3	4	4	14		4	4	3	3	14
152	3	4	4	4	15		4	4	3	4	15
153	3	4	4	4	15		4	4	5	4	17
154	4	4	4	4	16		4	4	4	4	16
155	4	2	3	4	13		4	4	2	3	13
156	5	4	5	4	18		5	4	3	4	16
157	4	4	4	4	16		4	4	4	4	16
158	4	4	4	4	16		3	4	4	4	15
159	4	4	4	4	16		4	4	4	4	16
160	4	4	4	4	16		4	4	4	4	16
161	4	4	4	4	16		4	4	4	4	16
162	3	4	4	4	15		4	4	4	3	15
163	5	5	5	5	20		5	5	5	5	20
164	4	4	3	4	15		5	4	4	4	17
165	3	4	5	4	16		5	4	5	4	18
166	5	5	5	5	20		5	5	5	5	20
167	1	1	1	1	4		5	5	5	5	20
168	3	4	4	4	15		5	5	5	5	20
169	1	4	5	4	14		5	5	5	5	20
170	5	4	4	4	17		4	4	4	5	17
171	4	5	5	4	18		5	4	5	5	19
172	5	5	5	5	20		4	5	4	4	17
173	2	4	4	3	13		4	4	2	4	14
174	5	4	3	4	16		5	4	3	4	16
175	5	4	3	4	16		3	4	5	4	16
176	3	5	3	4	15		4	4	5	4	17
177	3	4	4	4	15		3	4	4	4	15
178	4	3	4	4	15		4	4	4	4	16
179	3	4	3	4	14		3	4	3	4	14
180	4	4	3	4	15		4	5	5	5	19
181	4	3	5	3	15		5	4	3	4	16
182	4	4	3	4	15		5	4	4	4	17
183	3	4	3	4	14		3	4	3	2	12
184	3	3	3	3	12		4	4	4	4	16
185	5	5	5	5	20		5	5	5	5	20
186	4	4	5	4	17		4	4	3	4	15
187	4	4	4	5	17		2	5	5	5	17
188	3	2	2	2	9		5	1	4	2	12
189	4	3	4	4	15		3	4	4	4	15
190	4	3	4	4	15		4	4	4	4	16
191	4	4	4	4	16		3	3	3	3	12
192	4	4	4	4	16		5	5	5	5	20
193	4	4	3	3	14		5	4	5	4	18
194	5	5	5	5	20		5	5	5	5	20
195	4	4	4	5	17		4	4	4	3	15
196	3	4	2	4	13		3	3	2	4	12
197	4	4	4	4	16		4	4	4	4	16
198	2	4	4	4	14		4	4	4	4	16
199	4	3	4	5	16		4	5	4	3	16
200	4	4	4	4	16		4	4	4	4	16

## Sheet: ITU
Participants	ITU (for Robot Condition)			ITU Score
	Q1	Q2	Q3
1	4	4	3	3.66667
2	4	5	4	4.33333
3	4	4	4	4
4	4	4	5	4.33333
5	4	3	4	3.66667
6	1	1	1	1
7	4	4	4	4
8	4	4	5	4.33333
9	5	5	5	5
10	1	1	1	1
11	1	1	1	1
12	5	5	5	5
13	4	4	5	4.33333
14	3	4	4	3.66667
15	1	1	1	1
16	4	4	5	4.33333
17	4	4	4	4
18	4	4	5	4.33333
19	4	5	4	4.33333
20	1	1	1	1
21	2	2	2	2
22	5	3	3	3.66667
23	4	4	4	4
24	1	2	1	1.33333
25	4	4	4	4
26	4	4	5	4.33333
27	4	2	4	3.33333
28	2	3	2	2.33333
29	4	4	5	4.33333
30	3	4	3	3.33333
31	3	4	3	3.33333
32	2	3	3	2.66667
33	4	4	5	4.33333
34	5	5	4	4.66667
35	4	4	5	4.33333
36	4	4	3	3.66667
37	4	4	3	3.66667
38	4	3	4	3.66667
39	4	4	5	4.33333
40	4	4	4	4
41	4	4	5	4.33333
42	4	4	5	4.33333
43	4	4	3	3.66667
44	4	4	5	4.33333
45	1	2	2	1.66667
46	4	4	5	4.33333
47	4	4	5	4.33333
48	4	4	5	4.33333
49	4	4	3	3.66667
50	5	5	4	4.66667
51	1	1	4	2
52	5	4	4	4.33333
53	4	4	5	4.33333
54	4	3	4	3.66667
55	5	3	4	4
56	5	5	4	4.66667
57	5	3	4	4
58	2	2	2	2
59	5	5	4	4.66667
60	4	4	5	4.33333
61	4	4	5	4.33333
62	3	5	4	4
63	4	4	4	4
64	4	4	5	4.33333
65	4	4	5	4.33333
66	4	4	3	3.66667
67	4	4	5	4.33333
68	4	4	5	4.33333
69	2	2	4	2.66667
70	4	4	5	4.33333
71	4	4	5	4.33333
72	3	4	5	4
73	4	4	5	4.33333
74	4	4	4	4
75	4	4	5	4.33333
76	4	4	3	3.66667
77	5	4	3	4
78	4	4	4	4
79	5	4	5	4.66667
80	4	4	5	4.33333
81	5	5	4	4.66667
82	5	5	4	4.66667
83	4	4	4	4
84	3	3	4	3.33333
85	3	4	4	3.66667
86	4	4	5	4.33333
87	3	4	5	4
88	4	4	4	4
89	4	4	4	4
90	4	5	4	4.33333
91	5	5	5	5
92	4	4	5	4.33333
93	4	4	5	4.33333
94	4	4	5	4.33333
95	4	4	5	4.33333
96	4	3	3	3.33333
97	4	4	4	4
98	4	4	3	3.66667
99	2	3	2	2.33333
100	4	4	5	4.33333
101	4	4	5	4.33333
102	3	3	4	3.33333
103	3	3	4	3.33333
104	4	5	4	4.33333
105	3	4	3	3.33333
106	4	4	5	4.33333
107	3	3	4	3.33333
108	5	5	4	4.66667
109	5	3	4	4
110	4	4	5	4.33333
111	4	4	5	4.33333
112	3	3	4	3.33333
113	5	4	4	4.33333
114	4	4	4	4
115	3	3	3	3
116	4	4	5	4.33333
117	4	4	5	4.33333
118	4	4	3	3.66667
119	3	3	4	3.33333
120	3	3	4	3.33333
121	3	3	4	3.33333
122	3	3	4	3.33333
123	5	5	4	4.66667
124	3	3	4	3.33333
125	4	4	5	4.33333
126	3	3	4	3.33333
127	4	3	3	3.33333
128	4	4	4	4
129	4	3	2	3
130	5	5	4	4.66667
131	5	4	4	4.33333
132	5	4	4	4.33333
133	3	3	4	3.33333
134	4	4	3	3.66667
135	2	1	4	2.33333
136	5	3	4	4
137	4	4	5	4.33333
138	5	5	4	4.66667
139	4	4	4	4
140	4	4	3	3.66667
141	2	2	2	2
142	5	5	5	5
143	5	5	4	4.66667
144	5	4	4	4.33333
145	4	4	4	4
146	4	4	4	4
147	4	4	5	4.33333
148	4	4	4	4
149	1	1	1	1
150	4	4	4	4
151	3	4	4	3.66667
152	3	3	2	2.66667
153	4	4	3	3.66667
154	4	3	3	3.33333
155	3	4	2	3
156	4	4	3	3.66667
157	4	4	4	4
158	4	4	4	4
159	4	4	4	4
160	1	1	1	1
161	4	4	4	4
162	4	4	3	3.66667
163	3	3	2	2.66667
164	4	4	5	4.33333
165	4	4	3	3.66667
166	3	3	3	3
167	5	5	5	5
168	2	2	2	2
169	5	5	5	5
170	3	3	4	3.33333
171	5	4	4	4.33333
172	3	4	3	3.33333
173	1	1	1	1
174	4	4	3	3.66667
175	4	4	5	4.33333
176	4	4	3	3.66667
177	3	3	3	3
178	3	4	3	3.33333
179	4	4	3	3.66667
180	2	2	2	2
181	3	4	4	3.66667
182	5	4	4	4.33333
183	4	4	4	4
184	3	4	3	3.33333
185	2	2	2	2
186	2	2	2	2
187	4	4	4	4
188	3	1	4	2.66667
189	4	4	4	4
190	1	1	1	1
191	4	4	4	4
192	4	4	4	4
193	3	4	3	3.33333
194	1	1	1	1
195	3	4	2	3
196	3	4	3	3.33333
197	4	4	4	4
198	4	4	4	4
199	3	4	4	3.66667
200	4	4	4	4

## Sheet: Preference to use
Participants	Preference to use the proposed system (Robot condition)
	Boss	Teacher	Doctor	Psychologist / counselor	Stranger
1	5	4	5	4	5
2	1	1	1	1	1
3	4	4	4	5	4
4	4	5	3	4	5
5	4	5	4	3	4
6	4	4	3	3	2
7	2	2	2	2	2
8	4	5	4	5	4
9	4	3	4	5	4
10	5	4	3	4	4
11	4	4	4	4	4
12	5	5	4	5	4
13	4	3	3	3	4
14	5	4	2	4	4
15	3	4	3	4	3
16	3	4	3	4	3
17	3	4	3	4	3
18	4	5	4	5	4
19	3	4	4	4	3
20	3	4	3	3	4
21	5	4	3	4	4
22	4	5	4	5	4
23	4	5	4	4	4
24	4	4	5	4	4
25	5	5	4	4	4
26	4	3	4	3	5
27	2	4	2	2	4
28	4	4	4	4	4
29	4	5	4	4	3
30	3	2	3	4	3
31	4	4	3	4	4
32	4	4	3	3	1
33	2	1	1	1	1
34	4	5	4	5	4
35	3	4	3	4	3
36	5	4	5	5	4
37	4	5	4	5	4
38	5	4	5	4	4
39	3	2	4	3	1
40	4	5	4	5	4
41	4	5	4	5	4
42	4	5	4	3	4
43	4	2	4	4	4
44	5	4	3	3	4
45	3	4	3	4	3
46	4	5	3	4	5
47	4	4	3	2	1
48	5	4	4	4	5
49	4	4	2	2	4
50	4	1	3	3	3
51	5	5	5	5	2
52	3	4	3	4	3
53	3	4	2	2	4
54	4	4	4	3	3
55	4	3	4	4	5
56	4	5	4	5	4
57	1	1	1	1	3
58	4	5	5	4	4
59	4	3	4	4	3
60	4	5	2	4	3
61	2	4	1	1	4
62	4	4	4	4	4
63	3	4	5	4	5
64	4	3	2	4	3
65	4	3	4	5	4
66	3	4	3	4	2
67	4	4	4	4	4
68	4	3	5	4	4
69	2	4	4	4	5
70	2	3	2	2	1
71	4	4	4	4	4
72	3	4	3	5	3
73	4	3	2	4	3
74	2	2	2	2	2
75	4	4	5	5	4
76	4	5	5	5	4
77	4	4	4	4	4
78	3	4	1	4	4
79	2	2	2	2	2
80	4	4	4	1	1
81	5	2	3	4	3
82	4	5	4	5	4
83	4	5	4	3	4
84	4	3	4	5	4
85	3	4	3	4	4
86	5	4	3	4	5
87	4	5	4	3	4
88	4	4	5	4	3
89	4	5	4	5	4
90	5	5	5	5	5
91	3	2	4	5	4
92	4	2	4	1	1
93	4	5	4	4	3
94	4	3	4	3	4
95	4	3	2	4	3
96	4	3	4	3	4
97	4	3	2	3	2
98	5	5	4	5	1
99	2	2	1	1	2
100	5	5	4	4	5
101	4	5	4	5	4
102	4	2	4	3	3
103	4	2	3	4	3
104	5	4	4	4	5
105	5	5	5	5	5
106	2	2	3	3	3
107	3	5	4	2	3
108	1	4	4	4	4
109	2	3	5	4	3
110	4	3	4	3	3
111	2	2	2	2	2
112	2	2	3	2	3
113	1	1	1	1	1
114	4	3	4	4	3
115	5	4	5	4	5
116	4	4	4	4	4
117	2	4	3	3	4
118	3	2	4	4	4
119	2	4	3	2	5
120	4	4	4	4	3
121	3	4	5	4	5
122	5	4	4	4	5
123	4	5	4	5	4
124	4	3	4	5	4
125	4	5	4	3	4
126	5	4	4	3	4
127	4	4	4	4	4
128	4	5	4	3	3
129	5	4	5	4	5
130	3	4	5	4	4
131	3	4	3	2	3
132	5	4	5	4	5
133	4	5	3	4	3
134	4	4	5	4	4
135	1	1	1	1	1
136	4	3	4	4	4
137	4	5	4	4	5
138	4	5	4	5	4
139	2	4	2	4	4
140	4	3	3	4	2
141	4	4	3	3	4
142	4	4	3	4	4
143	4	4	4	4	4
144	1	1	1	3	2
145	4	3	4	2	4
146	4	4	4	4	4
147	3	4	5	3	4
148	1	1	1	1	1
149	4	1	4	5	4
150	3	4	3	4	3
151	5	4	4	5	4
152	3	3	3	3	3
153	4	5	3	4	4
154	2	5	4	4	3
155	4	5	4	5	4
156	4	4	5	4	5
157	4	5	4	4	5
158	3	3	3	3	3
159	4	5	4	5	4
160	4	4	3	3	3
161	4	3	5	3	3
162	3	5	4	3	4
163	4	4	4	4	4
164	4	4	4	4	4
165	4	3	4	5	3
166	4	2	3	4	4
167	4	3	4	3	4
168	3	4	3	3	4
169	1	1	1	1	1
170	4	5	4	4	5
171	4	5	3	4	5
172	4	3	2	3	4
173	1	1	1	2	4
174	4	5	4	5	4
175	3	3	3	3	3
176	3	4	4	3	4
177	5	4	4	4	5
178	4	5	4	5	4
179	4	3	4	3	3
180	2	1	1	1	1
181	4	3	4	4	3
182	4	5	4	5	3
183	4	5	4	5	4
184	3	5	5	4	3
185	2	4	3	2	2
186	4	3	2	3	3
187	4	4	3	3	4
188	5	5	4	4	4
189	3	3	3	3	3
190	5	3	4	3	4
191	4	3	4	3	4
192	5	5	4	5	4
193	4	1	4	1	1
194	4	5	4	5	4
195	4	3	4	5	5
196	4	4	3	3	3
197	2	2	2	2	2
198	4	4	4	4	4
199	4	5	4	5	4
200	4	4	2	2	4
